# Supplementary material for: Gestational age at birth and type 1 diabetes in childhood and young adulthood: a nationwide register study in Finland, Norway and Sweden
Source: Springer Nature journal article supplement (doi:10.1007/s00125-024-06139-y), 2024-04-13
Supplement: MOESM1 [file 26975806]

## Electronic Supplementary Materials (ESM)

Gestational age at birth and type 1 diabetes in childhood and young adulthood: a nationwide register study in Finland, Norway, and Sweden

Metsälä J, Risnes K, Persson M, Veijola R, Pulakka A, Heikkilä K, Alenius S, Gissler M, Opdahl S, Sandin S, Kajantie E

### Table of contents

**ESM Table 1** Data sources and ICD codes used in the definition of mother's diabetes and hypertensive disorders during pregnancy in Finland, Norway, and Sweden

**ESM Table 2** Full characteristics of the study population by gestational age categories

**ESM Table 3** Association between gestational age and the risk of type 1 diabetes – country-specific unadjusted and adjusted results

**ESM Table 4** Corrected p-values of the main analyses according to Holm procedure

**ESM Table 5** Country-specific associations between combinations of gestational age and birthweight z score and the risk of type 1 diabetes

**ESM Table 6** Country-specific total number and number of individuals with type 1 diabetes by gestational age and birthweight z score categories

**ESM Table 7** Country-specific associations between combination of gestational age and mother's type 1 diabetes status and risk of type 1 diabetes in offspring

**ESM Table 8** Country-specific associations between combination of gestational age and maternal hypertensive disorders during pregnancy and risk of type 1 diabetes in offspring

**ESM Table 9** Cause-specific hazards of type 1 diabetes and death and scenarios for extreme informative censoring

**ESM Table 10** Association between gestational age and the risk of type 1 diabetes – country-specific and pooled adjusted estimates from analyses investigating death as potential source of informative censoring with different assumptions

**ESM Table 11** Association between gestational age and the risk of type 1 diabetes. Comparison of the results from the main and sensitivity analysis of different time periods according to the start of the availability of type 1 diabetes diagnosis data in Sweden (since 1997) and in Norway (since 2008)

**ESM Table 12** Country-specific and pooled associations between gestational age and the risk of type 1 diabetes from the sibling analyses

**ESM Table 13** Country-specific and pooled associations between gestational age and the risk of type 1 diabetes birth using weight z score calculated according to Maršál reference

**ESM Table 14** Country-specific and pooled associations between combinations of gestational age and birthweight z score according to Maršál reference and the risk of type 1 diabetes

**ESM Table 15** Country-specific associations between gestational age week by week and the risk of type 1 diabetes

**ESM Fig. 1** Flow chart of the study participants

**ESM Fig. 2** Cause-specific cumulative incidence of type 1 diabetes in gestational age categories

**ESM Fig. 3** Country-specific associations between gestational age by completed weeks and the risk of type 1 diabetes

**ESM Table 1** Data sources and ICD codes used in the definition of mother's diabetes and hypertensive disorders during pregnancy in Finland, Norway and Sweden

| Variable name<br>Country                                | Definition/categories<br>of the variables | Data<br>source | ICD codes/pre-defined variables used<br>in the definition                              | Data extraction period / data availability if not the<br>full study period                                                                                                                                                                                                                           |
|---------------------------------------------------------|-------------------------------------------|----------------|----------------------------------------------------------------------------------------|------------------------------------------------------------------------------------------------------------------------------------------------------------------------------------------------------------------------------------------------------------------------------------------------------|
| <b>Mother's diabetes</b>                                |                                           |                |                                                                                        |                                                                                                                                                                                                                                                                                                      |
| Finland                                                 | Type 1 diabetes                           | NPR,<br>MBR    | ICD-10: E10, O24.0<br>ICD-9: 250*B<br>ICD8: 250*                                       | From the NPR data ICD-codes E10, 250*B and 250* that were recoded before child's date of birth were used in the definition<br><br>ICD-8 codes were used to define the date of first diagnosis, but subsequent ICD-9 codes were used to define the diabetes type <sup>a</sup>                         |
|                                                         | Type 2/other pre-pregnancy diabetes       | NPR,<br>MBR    | ICD-10: E11, E13, E14, O24.1, O24.2, O24.3<br>ICD-9: 250*A, 250*C, 250*X<br>ICD-8:250* | From the NPR data ICD-codes E11, E13, E14, 250*A, 250*C, 250*X and 250* that were recoded before child's date of birth were used in the definition<br><br>ICD-8 codes were used to define the date of first diagnosis, but subsequent ICD-9 codes were used to define the diabetes type <sup>a</sup> |
|                                                         | Gestational diabetes                      | MBR            | Pre-defined variables, ICD-10: O24.0, O24.9                                            | Pre-defined variables available since 2004                                                                                                                                                                                                                                                           |
|                                                         |                                           |                | NPR                                                                                    | ICD-10: O24.4, O24.9<br>ICD-9: 6480A, 6488A                                                                                                                                                                                                                                                          |
| Norway                                                  | Any pre-pregnancy diabetes                | MBR            | Pre-defined variable                                                                   | available before 1999                                                                                                                                                                                                                                                                                |
|                                                         | Type 1 diabetes                           | MBR            | Pre-defined variable                                                                   | available since 1999                                                                                                                                                                                                                                                                                 |
|                                                         | Type 2 or other pre-pregnancy diabetes    | MBR            | Pre-defined variables                                                                  | available since 1999                                                                                                                                                                                                                                                                                 |
|                                                         | Gestational diabetes                      | MBR            | Pre-defined variable                                                                   |                                                                                                                                                                                                                                                                                                      |
| Sweden                                                  | Type 1 diabetes                           | NPR            | E10                                                                                    | Diagnosis code recoded any time since 1997 was used in the definition for all children in the data <sup>b</sup>                                                                                                                                                                                      |
|                                                         | Pre-pregnancy diabetes                    | MBR            | Pre-defined variable                                                                   | In years 1990-1993, this variable may also have included previous gestational diabetes                                                                                                                                                                                                               |
| <b>Mother's hypertensive disorders during pregnancy</b> |                                           |                |                                                                                        |                                                                                                                                                                                                                                                                                                      |

|         |                                                                                                             |            |                                                                                                                                                  |                                                                            |
|---------|-------------------------------------------------------------------------------------------------------------|------------|--------------------------------------------------------------------------------------------------------------------------------------------------|----------------------------------------------------------------------------|
| Finland | Chronic hypertension or gestational hypertension (without pre-eclampsia or eclampsia in the same pregnancy) | NPR<br>MBR | ICD-10: O10 and O13<br>ICD-9/8: 6420X, 6421X, 6422X, 6423A, 6423B, 6423C, 63701                                                                  | Diagnosis codes recoded during index pregnancy were used in the definition |
|         | Pre-eclampsia or eclampsia                                                                                  | NPR<br>MBR | ICD-10: O11, O14, O15<br>ICD-9/8: 6427A, 6427B, 6427C, 6424A, 6424B, 6424C, 6425A, 6425B, 6425C, 63703, 63704, 63709, 6426A, 6426B, 6426C, 63710 | Diagnosis codes recoded during index pregnancy were used in the definition |
| Norway  | Chronic hypertension or gestational hypertension (without pre-eclampsia or eclampsia in the same pregnancy) | MBR        | Pre-defined variables                                                                                                                            |                                                                            |
|         | Pre-eclampsia or eclampsia                                                                                  | MBR        | Pre-defined variables                                                                                                                            |                                                                            |
| Sweden  | Chronic hypertension                                                                                        | MBR        | Pre-defined variable                                                                                                                             |                                                                            |

Abbreviations: NPR, National Patient Register; MBR, Medical Birth Register

<sup>a</sup> In Finland, diabetes types were distinguishable in the ICD-codes from version 9 onwards (adopted in 1987)

<sup>b</sup> In Sweden, diabetes types were distinguishable in the ICD-codes from version 10 onwards (adopted in 1997)

**ESM Table 2** Full characteristics of the study population by gestational age categories

| Characteristic                   | Gestational age category (weeks) |       |                            |       |                                  |       |                            |       |                          |       |                         |       |                         |       |
|----------------------------------|----------------------------------|-------|----------------------------|-------|----------------------------------|-------|----------------------------|-------|--------------------------|-------|-------------------------|-------|-------------------------|-------|
|                                  | Extremely preterm (23–27 weeks)  |       | Very preterm (28–31 weeks) |       | Moderately preterm (32–33 weeks) |       | Late preterm (34–36 weeks) |       | Early term (37–38 weeks) |       | Full-term (39–41 weeks) |       | Post-term (42–45 weeks) |       |
|                                  | <i>n</i>                         | %     | <i>n</i>                   | %     | <i>n</i>                         | %     | <i>n</i>                   | %     | <i>n</i>                 | %     | <i>n</i>                | %     | <i>n</i>                | %     |
| <b>Finland</b>                   |                                  |       |                            |       |                                  |       |                            |       |                          |       |                         |       |                         |       |
| Age, mother (years), mean (SD)   | 30.2                             | (5.7) | 30.1                       | (5.7) | 29.9                             | (5.7) | 29.7                       | (5.6) | 29.7                     | (5.4) | 29.2                    | (5.2) | 29.0                    | (5.2) |
| Parity, mother                   |                                  |       |                            |       |                                  |       |                            |       |                          |       |                         |       |                         |       |
| 0                                | 1650                             | 49.4  | 4197                       | 52.1  | 5875                             | 53.8  | 32,174                     | 48.8  | 113,803                  | 38.5  | 477,304                 | 39.9  | 40,023                  | 54.6  |
| 1                                | 857                              | 25.6  | 2083                       | 25.8  | 2784                             | 25.5  | 18,454                     | 28.0  | 98,327                   | 33.2  | 419,392                 | 35.1  | 19,840                  | 27.0  |
| 2 or more                        | 836                              | 25.0  | 1782                       | 22.1  | 2253                             | 20.6  | 15,328                     | 23.2  | 83,575                   | 28.3  | 299,363                 | 25.0  | 13,496                  | 18.4  |
| Education level, mother          |                                  |       |                            |       |                                  |       |                            |       |                          |       |                         |       |                         |       |
| Low                              | 603                              | 18.0  | 1344                       | 16.7  | 1738                             | 15.9  | 10,275                     | 15.6  | 43,825                   | 14.8  | 163,033                 | 13.6  | 10,541                  | 13.6  |
| Intermediate                     | 1953                             | 58.4  | 4811                       | 59.7  | 6405                             | 58.7  | 39,392                     | 59.7  | 178,906                  | 60.5  | 726,123                 | 60.7  | 44,044                  | 60.0  |
| High                             | 787                              | 23.5  | 1907                       | 23.7  | 2769                             | 25.4  | 16,289                     | 24.7  | 72,974                   | 24.7  | 306,903                 | 25.7  | 18,774                  | 25.6  |
| Diabetes, mother                 | 199                              | 6.0   | 769                        | 9.5   | 1207                             | 11.1  | 8469                       | 12.8  | 36,297                   | 12.3  | 92,623                  | 7.7   | 4337                    | 5.9   |
| Hypertensive disorders, mother   | 525                              | 15.7  | 2154                       | 26.7  | 2524                             | 23.1  | 11,527                     | 17.5  | 31,994                   | 10.8  | 68,202                  | 5.7   | 2927                    | 4.0   |
| Sex                              |                                  |       |                            |       |                                  |       |                            |       |                          |       |                         |       |                         |       |
| Male                             | 1815                             | 54.3  | 4466                       | 55.4  | 6096                             | 55.9  | 35,953                     | 54.5  | 156,745                  | 53.0  | 601,976                 | 50.3  | 37,700                  | 51.4  |
| Female                           | 1528                             | 45.7  | 3596                       | 44.6  | 4816                             | 44.1  | 30,003                     | 45.5  | 138,960                  | 47.0  | 594,083                 | 49.7  | 35,659                  | 48.6  |
| Birth year                       |                                  |       |                            |       |                                  |       |                            |       |                          |       |                         |       |                         |       |
| 1987–1989                        | 358                              | 10.7  | 782                        | 9.7   | 960                              | 8.8   | 6809                       | 10.3  | 32,147                   | 10.9  | 131,269                 | 11.0  | 7248                    | 9.9   |
| 1990–1999                        | 1150                             | 34.4  | 2809                       | 34.8  | 3843                             | 35.2  | 23,169                     | 35.1  | 105,549                  | 35.7  | 427,007                 | 35.7  | 26,404                  | 36.0  |
| 2000–2009                        | 1105                             | 33.0  | 2768                       | 34.3  | 3746                             | 34.3  | 21,333                     | 32.3  | 95,039                   | 32.1  | 379,577                 | 31.7  | 25,041                  | 34.1  |
| 2010–2016                        | 730                              | 21.8  | 1703                       | 21.1  | 2363                             | 21.7  | 14,645                     | 22.2  | 62,970                   | 21.3  | 258,206                 | 22.6  | 14,666                  | 20.0  |
| Birthweight z score <sup>a</sup> |                                  |       |                            |       |                                  |       |                            |       |                          |       |                         |       |                         |       |
| less than -2                     | 421                              | 12.6  | 1264                       | 15.7  | 1399                             | 12.8  | 5473                       | 8.3   | 12,286                   | 4.1   | 24,009                  | 2.0   | 1204                    | 1.6   |
| -2 to less than -1               | 418                              | 12.5  | 1282                       | 15.9  | 1691                             | 15.5  | 11,190                     | 17.0  | 46,925                   | 15.9  | 168,332                 | 14.1  | 9809                    | 13.4  |
| -1 to less than 0                | 785                              | 23.5  | 1902                       | 23.6  | 3090                             | 28.3  | 20,669                     | 31.3  | 100,597                  | 34.0  | 438,499                 | 36.7  | 27,154                  | 37.0  |
| 0 to less than 1                 | 937                              | 28.0  | 2014                       | 25.0  | 2845                             | 26.1  | 17,785                     | 27.0  | 87,322                   | 29.5  | 392,644                 | 32.8  | 24,713                  | 33.7  |
| 1 to less than 2                 | 555                              | 16.6  | 1131                       | 14.0  | 1342                             | 12.3  | 7462                       | 11.3  | 36,387                   | 12.3  | 142,435                 | 11.9  | 8869                    | 12.1  |
| 2 or more                        | 227                              | 6.8   | 469                        | 5.8   | 545                              | 5.0   | 3377                       | 5.1   | 12,188                   | 4.1   | 30,140                  | 2.5   | 1610                    | 2.2   |
| Age, father (years), mean (SD)   | 33.0                             | (6.4) | 33.0                       | (6.4) | 32.6                             | (6.4) | 32.5                       | (6.3) | 32.5                     | (6.1) | 32.1                    | (6.0) | 31.9                    | (6.0) |
| Education level, father          |                                  |       |                            |       |                                  |       |                            |       |                          |       |                         |       |                         |       |
| Low                              | 606                              | 18.1  | 1665                       | 20.7  | 2157                             | 19.8  | 12,957                     | 19.6  | 55,683                   | 18.8  | 217,771                 | 18.2  | 13,553                  | 18.5  |
| Intermediate                     | 1752                             | 52.4  | 4524                       | 56.1  | 6234                             | 57.1  | 38,136                     | 57.8  | 173,012                  | 58.5  | 702,672                 | 58.8  | 42,921                  | 58.5  |
| High                             | 648                              | 19.4  | 1590                       | 19.7  | 2250                             | 20.6  | 13,542                     | 20.5  | 62,718                   | 21.2  | 259,837                 | 21.7  | 15,573                  | 21.2  |
| Missing information              | 337                              | 10.1  | 283                        | 3.5   | 271                              | 2.5   | 1321                       | 2.0   | 4292                     | 1.5   | 15,779                  | 1.3   | 1312                    | 1.8   |

|                                  |      |       |      |       |        |       |        |       |         |       |           |       |        |       |
|----------------------------------|------|-------|------|-------|--------|-------|--------|-------|---------|-------|-----------|-------|--------|-------|
| Type 1 diabetes, father          | 6    | 0.2   | 37   | 0.4   | 52     | 0.4   | 240    | 0.4   | 1110    | 0.4   | 4528      | 0.4   | 267    | 0.4   |
| Country of birth, father         |      |       |      |       |        |       |        |       |         |       |           |       |        |       |
| Finland                          | 2900 | 86.7  | 7508 | 93.1  | 10,293 | 94.3  | 62,419 | 94.6  | 28,1813 | 95.3  | 1,139,806 | 95.3  | 69,314 | 94.5  |
| Other high-income country        | 64   | 1.9   | 156  | 1.9   | 203    | 1.9   | 1313   | 2.0   | 5828    | 2.0   | 24,970    | 2.1   | 1656   | 2.3   |
| Other country                    | 47   | 1.4   | 131  | 1.6   | 164    | 1.5   | 1011   | 1.5   | 4200    | 1.4   | 17,372    | 1.4   | 1190   | 1.6   |
| Missing information              | 332  | 9.9   | 267  | 3.3   | 252    | 2.3   | 1213   | 1.8   | 3864    | 1.3   | 13911     | 1.2   | 1199   | 1.6   |
| <b>Norway</b>                    |      |       |      |       |        |       |        |       |         |       |           |       |        |       |
| Age, mother (years), mean (SD)   | 30.1 | (5.5) | 29.7 | (5.5) | 29.7   | (5.4) | 29.5   | (5.4) | 29.8    | (5.3) | 29.4      | (5.0) | 28.7   | (5.0) |
| Parity, mother                   |      |       |      |       |        |       |        |       |         |       |           |       |        |       |
| 0                                | 1274 | 51.4  | 4430 | 55.9  | 5868   | 53.9  | 29,766 | 49.6  | 85,542  | 39.9  | 381,784   | 41.3  | 58,955 | 50.0  |
| 1                                | 665  | 26.8  | 2019 | 25.5  | 2997   | 27.5  | 18,357 | 30.6  | 76,863  | 35.9  | 346,497   | 37.5  | 37,737 | 32.0  |
| 2 or more                        | 541  | 21.8  | 1477 | 18.6  | 2029   | 18.6  | 11,939 | 19.9  | 51,866  | 24.2  | 195,935   | 21.2  | 21,148 | 18.0  |
| Education level, mother          |      |       |      |       |        |       |        |       |         |       |           |       |        |       |
| Low                              | 625  | 25.2  | 2016 | 25.4  | 2694   | 24.7  | 14,599 | 24.3  | 47,870  | 22.3  | 191,911   | 20.8  | 28,727 | 24.4  |
| Intermediate                     | 913  | 36.8  | 2988 | 37.7  | 4123   | 37.8  | 22,522 | 37.5  | 79,631  | 37.2  | 340,555   | 36.8  | 46,901 | 39.8  |
| High                             | 942  | 38.0  | 2992 | 36.9  | 4076   | 37.4  | 22,941 | 38.2  | 86,770  | 40.5  | 391,741   | 42.4  | 42,210 | 35.8  |
| Diabetes, mother                 | 51   | 2.1   | 247  | 3.1   | 373    | 3.4   | 2231   | 3.7   | 6990    | 3.3   | 11,723    | 1.3   | 489    | 0.4   |
| Hypertensive disorders, mother   | 456  | 18.4  | 2014 | 25.4  | 2316   | 21.3  | 9507   | 15.8  | 17,964  | 8.4   | 39,441    | 4.3   | 4007   | 3.4   |
| Sex                              |      |       |      |       |        |       |        |       |         |       |           |       |        |       |
| Male                             | 1290 | 52.0  | 4337 | 54.7  | 5929   | 54.4  | 32,173 | 53.6  | 110,484 | 51.6  | 469,223   | 50.8  | 63,016 | 53.5  |
| Female                           | 1190 | 48.0  | 3589 | 45.3  | 4965   | 45.6  | 27,889 | 46.3  | 103,787 | 48.4  | 454,993   | 49.2  | 54,779 | 46.5  |
| Birth year                       |      |       |      |       |        |       |        |       |         |       |           |       |        |       |
| 1987–1989                        | 121  | 4.9   | 529  | 6.7   | 840    | 7.7   | 4821   | 8.0   | 15,722  | 7.3   | 81,996    | 8.9   | 15,805 | 13.4  |
| 1990–1999                        | 669  | 27.0  | 2472 | 31.2  | 3426   | 31.4  | 19,215 | 32.0  | 63,130  | 29.5  | 302,623   | 32.7  | 56,020 | 47.5  |
| 2000–2009                        | 1022 | 41.2  | 3149 | 39.7  | 4247   | 39.0  | 22,480 | 37.4  | 83,089  | 38.8  | 319,200   | 34.5  | 33,387 | 28.3  |
| 2010–2016                        | 668  | 26.9  | 1776 | 22.4  | 2381   | 21.9  | 13,546 | 22.5  | 52,330  | 24.4  | 220,397   | 23.8  | 12,628 | 10.7  |
| Birthweight z score <sup>a</sup> |      |       |      |       |        |       |        |       |         |       |           |       |        |       |
| less than -2                     | 301  | 12.1  | 1203 | 15.2  | 1336   | 12.3  | 4894   | 8.1   | 9618    | 4.5   | 21,532    | 2.3   | 3708   | 3.5   |
| -2 to less than -1               | 328  | 13.2  | 1352 | 17.1  | 1714   | 15.7  | 9921   | 16.5  | 34,820  | 16.2  | 132,397   | 14.3  | 18,494 | 15.7  |
| -1 to less than 0                | 602  | 24.3  | 1092 | 24.0  | 3087   | 28.3  | 18,480 | 30.8  | 73,649  | 34.7  | 333,054   | 36.0  | 41,480 | 35.2  |
| 0 to less than 1                 | 684  | 27.6  | 2055 | 35.9  | 2780   | 25.5  | 15,367 | 26.0  | 62,377  | 29.1  | 298,475   | 32.3  | 36,485 | 31.0  |
| 1 to less than 2                 | 405  | 16.3  | 995  | 12.5  | 1297   | 11.9  | 7105   | 11.8  | 25,026  | 11.7  | 112,559   | 12.2  | 14,343 | 12.2  |
| 2 or more                        | 160  | 6.4   | 419  | 5.3   | 680    | 6.2   | 4025   | 6.7   | 8781    | 4.1   | 26,199    | 2.8   | 3330   | 2.8   |
| Age, father (years), mean (SD)   | 32.7 | (6.2) | 32.3 | (6.4) | 32.3   | (6.2) | 32.1   | (6.1) | 32.3    | (6.0) | 32.0      | (5.8) | 31.5   | (5.8) |
| Education level, father          |      |       |      |       |        |       |        |       |         |       |           |       |        |       |
| Low                              | 595  | 24.0  | 1885 | 23.8  | 2544   | 23.8  | 13,412 | 22.3  | 44,841  | 20.9  | 184,631   | 20.0  | 26,699 | 22.6  |
| Intermediate                     | 1090 | 43.9  | 3673 | 46.3  | 4937   | 45.3  | 27,822 | 46.3  | 98,721  | 46.1  | 422,980   | 45.8  | 54,768 | 46.5  |
| High                             | 718  | 28.9  | 2163 | 27.3  | 3142   | 28.8  | 17,493 | 29.1  | 66,314  | 31.0  | 299,988   | 32.4  | 34,232 | 29.0  |
| Missing information              | 77   | 3.1   | 205  | 2.6   | 271    | 2.5   | 1335   | 2.2   | 4395    | 2.0   | 16717     | 1.8   | 2171   | 1.8   |
| <b>Sweden</b>                    |      |       |      |       |        |       |        |       |         |       |           |       |        |       |
| Age, mother (years), mean (SD)   | 30.6 | (5.6) | 30.4 | (5.4) | 30.2   | (5.4) | 30.1   | (5.4) | 30.4    | (5.3) | 30.0      | (5.0) | 30.2   | (5.0) |

|                                  |      |       |      |       |       |       |        |       |         |       |         |       |         |       |
|----------------------------------|------|-------|------|-------|-------|-------|--------|-------|---------|-------|---------|-------|---------|-------|
| Parity, mother                   |      |       |      |       |       |       |        |       |         |       |         |       |         |       |
| 0                                | 2533 | 50.2  | 6856 | 49.3  | 9307  | 49.4  | 51,961 | 48.4  | 185,134 | 39.7  | 734,363 | 42.6  | 93,952  | 53.5  |
| 1                                | 1512 | 30.0  | 4219 | 30.3  | 5815  | 30.9  | 32,705 | 30.5  | 173,350 | 37.2  | 659,824 | 38.3  | 53,409  | 30.4  |
| 2 or more                        | 997  | 19.8  | 2827 | 20.3  | 3717  | 19.7  | 22,684 | 21.2  | 107,882 | 23.1  | 328,818 | 19.1  | 28,326  | 16.2  |
| Education level, mother          |      |       |      |       |       |       |        |       |         |       |         |       |         |       |
| Low                              | 675  | 13.4  | 1903 | 13.7  | 2493  | 13.2  | 13,937 | 13.0  | 57,586  | 12.4  | 187,287 | 10.9  | 18,392  | 10.5  |
| Intermediate                     | 2460 | 48.8  | 6923 | 49.8  | 9541  | 50.6  | 53,722 | 50.0  | 230,735 | 49.5  | 840,421 | 48.8  | 84,673  | 48.2  |
| High                             | 1907 | 37.8  | 5076 | 36.5  | 6805  | 36.1  | 39,691 | 37.0  | 178,045 | 38.2  | 695,297 | 40.4  | 72,622  | 41.3  |
| Diabetes, mother                 | 96   | 1.9   | 361  | 2.6   | 445   | 2.4   | 2719   | 2.5   | 8573    | 1.8   | 11,833  | 0.7   | 706     | 0.4   |
| Hypertensive disorders, mother   | 61   | 1.2   | 198  | 1.4   | 188   | 1.0   | 842    | 0.8   | 2531    | 0.5   | 5876    | 0.3   | 468     | 0.3   |
| Sex                              |      |       |      |       |       |       |        |       |         |       |         |       |         |       |
| Male                             | 2749 | 54.5  | 7578 | 54.5  | 10272 | 54.5  | 57,475 | 53.5  | 236,277 | 50.7  | 875,089 | 50.8  | 100,661 | 57.3  |
| Female                           | 2293 | 45.5  | 6324 | 45.5  | 8567  | 45.5  | 49,875 | 46.5  | 230,089 | 49.0  | 847,916 | 49.2  | 75,026  | 42.7  |
| Birth year                       |      |       |      |       |       |       |        |       |         |       |         |       |         |       |
| 1987–1989                        | 267  | 5.3   | 1331 | 9.6   | 1972  | 10.5  | 12,297 | 11.5  | 52,060  | 11.2  | 186,725 | 10.8  | 18,644  | 10.6  |
| 1990–1999                        | 1371 | 27.2  | 4755 | 34.2  | 6542  | 34.7  | 37,107 | 34.6  | 156,383 | 33.5  | 598,321 | 34.7  | 61,232  | 34.9  |
| 2000–2009                        | 1940 | 38.5  | 4651 | 33.4  | 6050  | 32.1  | 34,225 | 31.9  | 151,300 | 32.4  | 535,232 | 31.1  | 56,578  | 32.3  |
| 2010–2016                        | 1464 | 29.0  | 3165 | 22.7  | 4275  | 22.7  | 23,721 | 22.1  | 106,623 | 22.9  | 402,727 | 23.4  | 39,233  | 22.3  |
| Birthweight z score <sup>a</sup> |      |       |      |       |       |       |        |       |         |       |         |       |         |       |
| less than -2                     | 377  | 7.5   | 1380 | 9.9   | 1468  | 7.8   | 5786   | 5.4   | 13,023  | 2.8   | 26,709  | 1.6   | 2470    | 1.4   |
| -2 to less than -1               | 490  | 9.7   | 1537 | 11.1  | 2103  | 11.2  | 12,388 | 11.5  | 53,695  | 11.5  | 193,074 | 11.2  | 19,196  | 10.9  |
| -1 to less than 0                | 843  | 16.7  | 2581 | 18.6  | 4048  | 21.5  | 29,099 | 27.1  | 144,590 | 31.0  | 572,252 | 33.2  | 56,886  | 32.4  |
| 0 to less than 1                 | 1336 | 26.5  | 5594 | 25.9  | 5533  | 29.4  | 33,703 | 31.4  | 155,104 | 33.3  | 602,012 | 34.9  | 61,719  | 35.1  |
| 1 to less than 2                 | 1156 | 22.9  | 2936 | 21.1  | 3889  | 20.1  | 18,364 | 17.1  | 72,705  | 15.6  | 259,665 | 15.1  | 28,001  | 15.9  |
| 2 or more                        | 840  | 16.7  | 1874 | 13.5  | 1908  | 10.1  | 8010   | 7.5   | 27,249  | 5.8   | 69,293  | 4.0   | 7415    | 4.2   |
| Age, father (years), mean (SD)   | 32.9 | (6.3) | 32.8 | (6.2) | 32.6  | (6.2) | 32.5   | (6.1) | 32.8    | (6.0) | 32.5    | (5.8) | 32.7    | (5.9) |
| Education level, father          |      |       |      |       |       |       |        |       |         |       |         |       |         |       |
| Low                              | 768  | 15.2  | 2136 | 15.4  | 2844  | 15.1  | 15,723 | 14.7  | 66,571  | 14.3  | 230,047 | 13.4  | 22,671  | 12.9  |
| Intermediate                     | 2528 | 50.1  | 7300 | 52.5  | 9761  | 51.8  | 56,247 | 52.4  | 241,520 | 51.8  | 881,782 | 51.2  | 89,140  | 50.7  |
| High                             | 1527 | 30.3  | 4091 | 29.4  | 5733  | 30.4  | 32,589 | 30.4  | 147,579 | 31.6  | 574,252 | 33.3  | 59,928  | 34.1  |
| Missing information              | 219  | 4.3   | 375  | 2.7   | 501   | 2.7   | 2791   | 2.6   | 10,696  | 2.3   | 36,924  | 2.1   | 3948    | 2.3   |

<sup>a</sup> Birthweight z scores calculated according to Sankilampi [22]

**ESM Table 3** Association between gestational age and risk of type 1 diabetes – country-specific and pooled unadjusted and adjusted estimates

| Country                                         | Gestational age category (weeks) | Type 1 diabetes, <i>n</i>                       | Total, <i>n</i> | Model                                           |             |                                                 |             |                                      |             |                                                 |             |                      |             |                      |             |
|-------------------------------------------------|----------------------------------|-------------------------------------------------|-----------------|-------------------------------------------------|-------------|-------------------------------------------------|-------------|--------------------------------------|-------------|-------------------------------------------------|-------------|----------------------|-------------|----------------------|-------------|
|                                                 |                                  |                                                 |                 | Country: <i>n</i>                               |             |                                                 |             |                                      |             |                                                 |             |                      |             |                      |             |
|                                                 |                                  |                                                 |                 | Unadjusted                                      |             | Model 1 <sup>a</sup>                            |             | Model 2 <sup>b</sup><br>(main model) |             | Model 3 <sup>c</sup>                            |             | Model 4 <sup>d</sup> |             | Model 5 <sup>e</sup> |             |
| FI: 1,653,396<br>NO: 1,337,689<br>SE: 2,510,191 |                                  | FI: 1,653,396<br>NO: 1,337,689<br>SE: 2,510,191 |                 | FI: 1,653,396<br>NO: 1,337,689<br>SE: 2,510,191 |             | FI: 1,629,801<br>NO: 1,312,749<br>SE: 2,454,737 |             | FI: 1,629,801                        |             | FI: 1,653,377<br>NO: 1,337,689<br>SE: 2,246,097 |             |                      |             |                      |             |
| HR                                              | 95% CI                           | HR                                              | 95% CI          | HR                                              | 95% CI      | HR                                              | 95% CI      | HR                                   | 95% CI      | HR                                              | 95% CI      | HR                   | 95% CI      |                      |             |
| Finland                                         | 23–27                            | 12                                              | 3343            | 0.73                                            | 0.42, 1.29  | 0.72                                            | 0.41, 1.27  | 0.70                                 | 0.40, 1.23  | 0.71                                            | 0.40, 1.25  | 0.71                 | 0.40, 1.26  | 0.69                 | 0.39, 1.22  |
|                                                 | 28–31                            | 45                                              | 8062            | 0.84                                            | 0.63, 1.13  | 0.82                                            | 0.62, 1.11  | 0.79                                 | 0.59, 1.06  | 0.81                                            | 0.60, 1.10  | 0.80                 | 0.60, 1.08  | 0.79                 | 0.58, 1.05  |
|                                                 | 32–33                            | 90                                              | 10,912          | 1.21                                            | 0.98, 1.49  | 1.18                                            | 0.96, 1.46  | 1.10                                 | 0.90, 1.36  | 1.11                                            | 0.90, 1.37  | 1.09                 | 0.88, 1.35  | 1.10                 | 0.89, 1.35  |
|                                                 | 34–36                            | 557                                             | 65,956          | 1.21                                            | 1.11, 1.32  | 1.19                                            | 1.10, 1.30  | 1.10                                 | 1.01, 1.20  | 1.10                                            | 1.01, 1.20  | 1.10                 | 1.01, 1.20  | 1.10                 | 1.00, 1.20  |
|                                                 | 37–38                            | 2587                                            | 295,705         | 1.23                                            | 1.17, 1.28  | 1.22                                            | 1.17, 1.27  | 1.16                                 | 1.11, 1.22  | 1.16                                            | 1.11, 1.22  | 1.16                 | 1.11, 1.21  | 1.16                 | 1.11, 1.22  |
|                                                 | 39–41                            | 8533                                            | 1,196,059       | 1.00                                            | [Reference] | 1.00                                            | [Reference] | 1.00                                 | [Reference] | 1.00                                            | [Reference] | 1.00                 | [Reference] | 1.00                 | [Reference] |
|                                                 | 42–45                            | 502                                             | 73,359          | 0.96                                            | 0.87, 1.04  | 0.95                                            | 0.87, 1.04  | 0.96                                 | 0.87, 1.05  | 0.95                                            | 0.87, 1.04  | 0.95                 | 0.87, 1.04  | 0.96                 | 0.87, 1.05  |
| Norway                                          | 23–27                            | 6                                               | 2480            | 0.54                                            | 0.24, 1.21  | 0.58                                            | 0.26, 1.28  | 0.56                                 | 0.25, 1.26  | 0.58                                            | 0.26, 1.29  | <sup>f</sup>         |             | 0.55                 | 0.25, 1.23  |
|                                                 | 28–31                            | 24                                              | 7926            | 0.65                                            | 0.44, 0.98  | 0.66                                            | 0.44, 0.98  | 0.63                                 | 0.42, 0.95  | 0.59                                            | 0.39, 0.90  |                      |             | 0.61                 | 0.41, 0.92  |
|                                                 | 32–33                            | 55                                              | 10,894          | 1.09                                            | 0.83, 1.42  | 1.09                                            | 0.83, 1.42  | 1.04                                 | 0.80, 1.36  | 1.06                                            | 0.81, 1.39  |                      |             | 1.02                 | 0.78, 1.33  |
|                                                 | 34–36                            | 320                                             | 60,062          | 1.15                                            | 1.03, 1.29  | 1.15                                            | 1.02, 1.29  | 1.09                                 | 0.97, 1.22  | 1.19                                            | 0.97, 1.22  |                      |             | 1.07                 | 0.96, 1.21  |
|                                                 | 37–38                            | 1160                                            | 214,271         | 1.18                                            | 1.11, 1.26  | 1.21                                            | 1.13, 1.29  | 1.16                                 | 1.09, 1.24  | 1.17                                            | 1.09, 1.25  |                      |             | 1.15                 | 1.08, 1.23  |
|                                                 | 39–41                            | 4253                                            | 924,216         | 1.00                                            | [Reference] | 1.00                                            | [Reference] | 1.00                                 | [Reference] | 1.00                                            | [Reference] |                      |             | 1.00                 | [Reference] |
|                                                 | 42–45                            | 546                                             | 117,840         | 0.95                                            | 0.87, 1.04  | 0.84                                            | 0.77, 0.92  | 0.85                                 | 0.78, 0.93  | 0.86                                            | 0.78, 0.94  |                      |             | 0.85                 | 0.78, 0.93  |
| Sweden                                          | 23–27                            | 17                                              | 5042            | 0.65                                            | 0.40, 1.04  | 0.65                                            | 0.41, 1.05  | 0.61                                 | 0.38, 0.98  | 0.63                                            | 0.39, 1.01  | <sup>f</sup>         |             | 0.62                 | 0.38, 1.00  |
|                                                 | 28–31                            | 79                                              | 13,902          | 0.89                                            | 0.71, 1.11  | 0.88                                            | 0.71, 1.10  | 0.83                                 | 0.66, 1.03  | 0.79                                            | 0.63, 0.99  |                      |             | 0.79                 | 0.62, 0.99  |
|                                                 | 32–33                            | 123                                             | 18,839          | 1.01                                            | 0.84, 1.20  | 1.00                                            | 0.84, 1.19  | 0.94                                 | 0.79, 1.12  | 0.94                                            | 0.79, 1.13  |                      |             | 0.91                 | 0.75, 1.10  |
|                                                 | 34–36                            | 865                                             | 107,350         | 1.23                                            | 1.15, 1.32  | 1.22                                            | 1.14, 1.31  | 1.15                                 | 1.07, 1.23  | 1.16                                            | 1.08, 1.24  |                      |             | 1.13                 | 1.05, 1.21  |
|                                                 | 37–38                            | 3558                                            | 466,366         | 1.18                                            | 1.13, 1.22  | 1.18                                            | 1.13, 1.22  | 1.13                                 | 1.09, 1.18  | 1.13                                            | 1.09, 1.18  |                      |             | 1.11                 | 1.07, 1.16  |
|                                                 | 39–41                            | 11,189                                          | 1,723,005       | 1.00                                            | [Reference] | 1.00                                            | [Reference] | 1.00                                 | [Reference] | 1.00                                            | [Reference] |                      |             | 1.00                 | [Reference] |
|                                                 | 42–45                            | 1025                                            | 175,687         | 0.89                                            | 0.84, 0.95  | 0.88                                            | 0.83, 0.94  | 0.89                                 | 0.83, 0.95  | 0.89                                            | 0.83, 0.95  |                      |             | 0.87                 | 0.81, 0.94  |
| Pooled                                          | 23–27                            | 35                                              | 10,865          | 0.66                                            | 0.47, 0.91  | 0.66                                            | 0.47, 0.92  | 0.63                                 | 0.45, 0.88  | 0.65                                            | 0.46, 0.90  |                      |             | 0.63                 | 0.45, 0.88  |
|                                                 | 28–31                            | 148                                             | 29,890          | 0.83                                            | 0.71, 0.98  | 0.83                                            | 0.70, 0.97  | 0.78                                 | 0.67, 0.92  | 0.76                                            | 0.64, 0.90  |                      |             | 0.76                 | 0.64, 0.89  |
|                                                 | 32–33                            | 268                                             | 40,645          | 1.09                                            | 0.97, 1.23  | 1.07                                            | 0.95, 1.21  | 1.01                                 | 0.90, 1.14  | 1.02                                            | 0.90, 1.15  |                      |             | 1.00                 | 0.88, 1.13  |
|                                                 | 34–36                            | 1742                                            | 233,368         | 1.21                                            | 1.15, 1.27  | 1.20                                            | 1.14, 1.26  | 1.12                                 | 1.07, 1.18  | 1.16                                            | 1.08, 1.24  |                      |             | 1.11                 | 1.06, 1.17  |
|                                                 | 37–38                            | 7305                                            | 976,342         | 1.20                                            | 1.17, 1.23  | 1.20                                            | 1.17, 1.23  | 1.15                                 | 1.11, 1.18  | 1.15                                            | 1.11, 1.18  |                      |             | 1.13                 | 1.10, 1.17  |
|                                                 | 39–41                            | 23,964                                          | 3,843,280       | 1.00                                            | [Reference] | 1.00                                            | [Reference] | 1.00                                 | [Reference] | 1.00                                            | [Reference] |                      |             | 1.00                 | [Reference] |
|                                                 | 42–45                            | 2073                                            | 366,886         | 0.92                                            | 0.88, 0.96  | 0.89                                            | 0.85, 0.93  | 0.90                                 | 0.85, 0.94  | 0.90                                            | 0.86, 0.94  |                      |             | 0.89                 | 0.85, 0.93  |

FI, Finland; NO, Norway; SE, Sweden



<sup>a</sup> Model 1: adjusted for child's sex and birth year

<sup>b</sup> Model 2: adjusted for child's sex, birth year and birthweight z score and mother's age, education level, parity, diabetes during pregnancy and hypertensive disorders during pregnancy

<sup>c</sup> Model 3: adjusted for child's sex, birth year and birthweight z score and mother's age, education level, parity, diabetes during pregnancy and hypertensive disorders during pregnancy as well as father's age and education

<sup>d</sup> Model 4: adjusted for child's sex, birth year and birthweight z score and mother's age, education level, parity, diabetes during pregnancy, hypertensive disorders during pregnancy, father's age and education as well as father's type 1 diabetes and country of birth

<sup>e</sup> Model 5: adjusted for child's sex, birth year and birthweight z score and mother's age, education level, parity, diabetes during pregnancy, and hypertensive disorders during pregnancy as well as caesarean section

<sup>f</sup> Information on father's type 1 diabetes and country of birth was not available in Norway and Sweden

**ESM Table 4.** Corrected p-values of the main analyses according to Holm procedure<sup>1</sup>

| <b>Comparison</b>         | <b>p-value from<br/>original,<br/>pooled<br/>analysis</b> | <b>Re-ordering<br/>of the p-<br/>values</b> | <b><math>\alpha/k</math><br/><math>\alpha/(k-1)</math></b> |
|---------------------------|-----------------------------------------------------------|---------------------------------------------|------------------------------------------------------------|
| H1: 23–27 wk vs. 39–41 wk | 0.006                                                     | H6: <0.001                                  | 0.05/6 = 0.008                                             |
| H2: 28–31 wk vs. 39–41 wk | 0.003                                                     | H5: <0.001                                  | 0.05/5 = 0.010                                             |
| H3: 32–33 wk vs. 39–41 wk | 0.859                                                     | H4: <0.001                                  | 0.05/4 = 0.013                                             |
| H4: 34–36 wk vs. 39–41 wk | <0.001                                                    | H2: 0.003                                   | 0.05/3 = 0.017                                             |
| H5: 37–38 wk vs. 39–41 wk | <0.001                                                    | H1: 0.006                                   | 0.05/2 = 0.025                                             |
| H6: 42–45 wk vs. 39–41 wk | <0.001                                                    | H3: 0.859                                   | 0.05/1 = 0.05                                              |

<sup>1</sup> Holm S. A Simple Sequentially Rejective Multiple Test Procedure. Scandinavian Journal of Statistics 1979;6:65–70.

**ESM Table 5** Country-specific associations of combinations of gestational age and birthweight z score with the risk of type 1 diabetes

| Country | Gestational age category (weeks) | Birthweight z score category <sup>a</sup><br>Country: type 1 diabetes/total, <i>n</i> |            |                                                         |            |                                                          |            |                                                          |             |                                                         |            |                                                     |            |
|---------|----------------------------------|---------------------------------------------------------------------------------------|------------|---------------------------------------------------------|------------|----------------------------------------------------------|------------|----------------------------------------------------------|-------------|---------------------------------------------------------|------------|-----------------------------------------------------|------------|
|         |                                  | < -2                                                                                  |            | -2 to < -1                                              |            | -1 to < 0                                                |            | 0 to < +1                                                |             | +1 to < +2                                              |            | ≥ +2                                                |            |
|         |                                  | FI: 245/46,056<br>NO: 186/42,592<br>SE: 316/51,213                                    |            | FI: 1627/239,647<br>NO: 837/199,026<br>SE: 1713/282,483 |            | FI: 4167/592,696<br>NO: 2081/472,254<br>SE: 5195/810,299 |            | FI: 4102/528,260<br>NO: 2099/418,493<br>SE: 5919/836,001 |             | FI: 1677/198,181<br>NO: 890/161,730<br>SE: 2772/386,606 |            | FI: 508/48,556<br>NO: 271/43,594<br>SE: 941/116,589 |            |
|         |                                  | HR <sup>b</sup>                                                                       | 95%CI      | HR <sup>b</sup>                                         | 95%CI      | HR <sup>b</sup>                                          | 95%CI      | HR <sup>b</sup>                                          | 95%CI       | HR <sup>b</sup>                                         | 95%CI      | HR <sup>b</sup>                                     | 95%CI      |
| Finland | <32                              | 0.36                                                                                  | 0.14, 0.97 | 0.74                                                    | 0.38, 1.42 | 0.91                                                     | 0.57, 1.47 | 0.84                                                     | 0.52, 1.35  | 0.69                                                    | 0.34, 1.37 | 0.37                                                | 0.09, 1.48 |
|         | 32–33                            | 0.65                                                                                  | 0.31, 1.37 | 0.76                                                    | 0.41, 1.42 | 1.21                                                     | 0.84, 1.76 | 0.95                                                     | 0.62, 1.47  | 1.40                                                    | 0.86, 2.29 | 1.21                                                | 0.60, 2.42 |
|         | 34–36                            | 0.49                                                                                  | 0.31, 0.75 | 1.02                                                    | 0.82, 1.27 | 1.03                                                     | 0.88, 1.21 | 1.12                                                     | 0.95, 1.31  | 1.18                                                    | 0.94, 1.47 | 1.23                                                | 0.93, 1.62 |
|         | 37–38                            | 0.95                                                                                  | 0.77, 1.18 | 0.96                                                    | 0.86, 1.08 | 1.08                                                     | 1.00, 1.17 | 1.15                                                     | 1.06, 1.24  | 1.33                                                    | 1.19, 1.47 | 1.18                                                | 1.00, 1.39 |
|         | 39–41                            | 0.71                                                                                  | 0.59, 0.85 | 0.93                                                    | 0.87, 0.99 | 0.93                                                     | 0.88, 0.97 | 1.00                                                     | [Reference] | 1.00                                                    | 0.93, 1.07 | 1.11                                                | 0.98, 1.25 |
|         | 42–45                            | 0.31                                                                                  | 0.10, 0.97 | 0.92                                                    | 0.72, 1.17 | 0.86                                                     | 0.74, 1.00 | 0.97                                                     | 0.84, 1.13  | 1.05                                                    | 0.82, 1.33 | 0.89                                                | 0.49, 1.61 |
| Norway  | <32                              | 0.68                                                                                  | 0.28, 1.64 | 0.47                                                    | 0.18, 1.26 | 0.41                                                     | 0.17, 0.98 | 0.81                                                     | 0.45, 1.47  | 0.42                                                    | 0.13, 1.30 | 0.52                                                | 0.13, 2.09 |
|         | 32–33                            | 0.43                                                                                  | 0.14, 1.34 | 0.34                                                    | 0.11, 1.06 | 1.24                                                     | 0.79, 1.96 | 1.07                                                     | 0.65, 1.79  | 0.96                                                    | 0.46, 2.03 | 1.67                                                | 0.83, 3.35 |
|         | 34–36                            | 1.10                                                                                  | 0.76, 1.60 | 1.00                                                    | 0.75, 1.33 | 0.94                                                     | 0.76, 1.17 | 1.21                                                     | 0.99, 1.50  | 0.80                                                    | 0.57, 1.13 | 0.94                                                | 0.65, 1.36 |
|         | 37–38                            | 0.81                                                                                  | 0.59, 1.11 | 0.94                                                    | 0.79, 1.11 | 1.00                                                     | 0.89, 1.13 | 1.16                                                     | 1.03, 1.31  | 1.38                                                    | 1.18, 1.61 | 1.22                                                | 0.96, 1.55 |
|         | 39–41                            | 0.81                                                                                  | 0.66, 1.00 | 0.82                                                    | 0.75, 0.91 | 0.89                                                     | 0.83, 0.96 | 1.00                                                     | [Reference] | 1.08                                                    | 0.98, 1.18 | 1.02                                                | 0.86, 1.21 |
|         | 42–45                            | 0.59                                                                                  | 0.36, 0.99 | 0.68                                                    | 0.54, 0.85 | 0.78                                                     | 0.67, 0.90 | 0.90                                                     | 0.77, 1.05  | 0.79                                                    | 0.61, 1.02 | 0.87                                                | 0.54, 1.44 |
| Sweden  | <32                              | 0.60                                                                                  | 0.29, 1.26 | 0.60                                                    | 0.30, 1.20 | 1.11                                                     | 0.75, 1.66 | 0.72                                                     | 0.48, 1.09  | 0.56                                                    | 0.34, 0.93 | 0.92                                                | 0.58, 1.46 |
|         | 32–33                            | 0.84                                                                                  | 0.43, 1.62 | 0.61                                                    | 0.32, 1.18 | 1.05                                                     | 0.73, 1.51 | 0.91                                                     | 0.65, 1.28  | 0.69                                                    | 0.44, 1.09 | 1.47                                                | 0.98, 2.18 |
|         | 34–36                            | 0.69                                                                                  | 0.48, 1.00 | 0.82                                                    | 0.65, 1.03 | 1.05                                                     | 0.92, 1.21 | 1.21                                                     | 1.07, 1.37  | 1.33                                                    | 1.15, 1.55 | 1.27                                                | 1.03, 1.57 |
|         | 37–38                            | 0.83                                                                                  | 0.66, 1.04 | 0.96                                                    | 0.86, 1.07 | 1.09                                                     | 1.01, 1.16 | 1.19                                                     | 1.12, 1.27  | 1.13                                                    | 1.04, 1.23 | 1.14                                                | 1.00, 1.30 |
|         | 39–41                            | 0.94                                                                                  | 0.81, 1.09 | 0.90                                                    | 0.85, 0.96 | 0.94                                                     | 0.90, 0.99 | 1.00                                                     | [Reference] | 1.04                                                    | 0.98, 1.10 | 1.05                                                | 0.95, 1.15 |
|         | 42–45                            | 1.04                                                                                  | 0.67, 1.64 | 0.84                                                    | 0.69, 1.01 | 0.85                                                     | 0.76, 0.95 | 0.87                                                     | 0.78, 0.97  | 0.92                                                    | 0.79, 1.06 | 0.81                                                | 0.60, 1.11 |

FI, Finland; NO, Norway; SE, Sweden

<sup>a</sup> Birthweight z scores calculated according to Sankilampi et al [22]

<sup>b</sup> HRs are adjusted for child's sex and birth year and mother's age, parity, education level, diabetes during pregnancy, and hypertensive disorders during pregnancy (model 2)

**ESM Table 6** Country-specific total number and number of individuals with type 1 diabetes by gestational age and birthweight z score categories

| Country | Gestational age category (weeks) | Birthweight z score category <sup>a</sup>          |                                                         |                                                          |                                                          |                                                         |                                                     |
|---------|----------------------------------|----------------------------------------------------|---------------------------------------------------------|----------------------------------------------------------|----------------------------------------------------------|---------------------------------------------------------|-----------------------------------------------------|
|         |                                  | Country: type 1 diabetes/total, <i>n</i>           |                                                         |                                                          |                                                          |                                                         |                                                     |
|         |                                  | < -2                                               | -2 to < -1                                              | -1 to < 0                                                | 0 to < +1                                                | +1 to < +2                                              | ≥ +2                                                |
|         |                                  | FI: 245/46,056<br>NO: 186/42,592<br>SE: 316/51,213 | FI: 1627/239,647<br>NO: 837/199,026<br>SE: 1713/282,483 | FI: 4167/592,696<br>NO: 2081/472,254<br>SE: 5195/810,299 | FI: 4102/528,260<br>NO: 2099/418,493<br>SE: 5919/836,001 | FI: 1677/198,181<br>NO: 890/161,730<br>SE: 2772/386,606 | FI: 508/48,556<br>NO: 271/43,594<br>SE: 941/116,589 |
|         |                                  | Type 1 diabetes/<br>total, <i>n</i>                | Type 1 diabetes/<br>total, <i>n</i>                     | Type 1 diabetes/<br>total, <i>n</i>                      | Type 1 diabetes/<br>total, <i>n</i>                      | Type 1 diabetes/<br>total, <i>n</i>                     | Type 1 diabetes/<br>total, <i>n</i>                 |
| Finland | <32                              | <5/1685                                            | 9/1700                                                  | 17/2687                                                  | 17/2951                                                  | 8/1686                                                  | <5/696                                              |
|         | 32–33                            | 7/1399                                             | 10/1691                                                 | 28/3090                                                  | 21/2845                                                  | 16/1342                                                 | 8/545                                               |
|         | 34–36                            | 20/5473                                            | 84/11,190                                               | 160/20,699                                               | 158/17,785                                               | 80/7462                                                 | 55/3377                                             |
|         | 37–38                            | 85/12286                                           | 332/46,925                                              | 820/100,597                                              | 787/87,322                                               | 405/36,387                                              | 158/12188                                           |
|         | 39–41                            | 126/24009                                          | 1125/168,332                                            | 2969/438,499                                             | 2941/392,644                                             | 1098/142,435                                            | 274/30140                                           |
|         | 42–45                            | <5/1204                                            | 67/9809                                                 | 173/27,154                                               | 178/24,713                                               | 70/8869                                                 | 11/1610                                             |
| Norway  | <32                              | 5/1504                                             | <5/1680                                                 | 5/2504                                                   | 11/2739                                                  | <5/1400                                                 | <5/579                                              |
|         | 32–33                            | <5/1336                                            | <5/1714                                                 | 19/3087                                                  | 15/2780                                                  | 7/1297                                                  | 8/680                                               |
|         | 34–36                            | 28/4894                                            | 49/9921                                                 | 84/18,480                                                | 96/15,637                                                | 33/7105                                                 | 30/4025                                             |
|         | 37–38                            | 39/9618                                            | 156/34,820                                              | 351/73,649                                               | 354/62,377                                               | 186/25,026                                              | 74/8781                                             |
|         | 39–41                            | 96/21532                                           | 546/132,397                                             | 1433/333,054                                             | 1438/298,475                                             | 599/112,559                                             | 141/26199                                           |
|         | 42–45                            | 15/3708                                            | 79/18,494                                               | 189/41,480                                               | 185/36,485                                               | 62/14,343                                               | 16/3330                                             |
| Sweden  | <32                              | 7/1757                                             | 8/2027                                                  | 25/3424                                                  | 23/4930                                                  | 15/4092                                                 | 18/2714                                             |
|         | 32–33                            | 9/1468                                             | 9/2103                                                  | 29/4048                                                  | 34/5533                                                  | 19/3779                                                 | 23/1908                                             |
|         | 34–36                            | 29/5786                                            | 71/12,388                                               | 211/29,099                                               | 281/33,703                                               | 180/18,364                                              | 93/8010                                             |
|         | 37–38                            | 76/13023                                           | 348/53,695                                              | 1047/144,590                                             | 1246/155,104                                             | 582/72,705                                              | 259/27249                                           |
|         | 39–41                            | 176/26709                                          | 1166/193,074                                            | 3556/572,252                                             | 3977/602,012                                             | 1806/259,665                                            | 508/69293                                           |
|         | 42–45                            | 19/2470                                            | 111/19,196                                              | 327/56,886                                               | 358/61,719                                               | 170/28,001                                              | 40/7415                                             |

FI, Finland; NO, Norway; SE, Sweden

<sup>a</sup> Birthweight z scores calculated according to Sankilampi et al [22]

**ESM Table 7** Country-specific associations of combination of gestational age and mother's type 1 diabetes status with risk of type 1 diabetes in offspring

| Country | Gestational age category (weeks) | Maternal type 1 diabetes <sup>a</sup>                            |                 |             |                                               |                 |             |
|---------|----------------------------------|------------------------------------------------------------------|-----------------|-------------|-----------------------------------------------|-----------------|-------------|
|         |                                  | Country: type 1 diabetes/total, <i>n</i>                         |                 |             |                                               |                 |             |
|         |                                  | No                                                               |                 |             | Yes                                           |                 |             |
|         |                                  | FI: 12,044/1,646,018<br>NO: 2661/815,337<br>SE: 16,106/2,488,805 |                 |             | FI: 282/7378<br>NO: 86/3914<br>SE: 750/21,386 |                 |             |
|         |                                  | Type 1 diabetes/<br>total, <i>n</i>                              | HR <sup>b</sup> | 95%CI       | Type 1 diabetes/<br>total, <i>n</i>           | HR <sup>b</sup> | 95%CI       |
| Finland | <32                              | 50/11,199                                                        | 0.73            | 0.56, 0.97  | 7/206                                         | 6.44            | 3.07, 13.53 |
|         | 32–33                            | 76/10,637                                                        | 1.05            | 0.84, 1.32  | 14/275                                        | 8.14            | 4.81, 13.77 |
|         | 34–36                            | 499/64,167                                                       | 1.12            | 1.02, 1.22  | 58/1789                                       | 5.40            | 4.16, 7.00  |
|         | 37–38                            | 2429/291,875                                                     | 1.17            | 1.12, 1.22  | 158/3830                                      | 6.22            | 5.30, 7.29  |
|         | 39–41                            | 8489/1,194,796                                                   | 1.00            | [Reference] | 44/1263                                       | 5.55            | 4.11, 7.25  |
|         | 42–45                            | 501/73,344                                                       | 0.95            | 0.87, 1.05  | <5/15                                         | 9.36            | 1.32, 66.47 |
| Norway  | <32                              | 13/6970                                                          | 0.58            | 0.34, 1.01  | 0/101                                         | <sup>c</sup>    |             |
|         | 32–33                            | 25/6925                                                          | 1.11            | 0.74, 1.64  | 5/130                                         | 11.47           | 4.75, 27.67 |
|         | 34–36                            | 146/37,571                                                       | 1.21            | 1.02, 1.44  | 15/678                                        | 6.59            | 3.95, 11.01 |
|         | 37–38                            | 537/141,577                                                      | 1.20            | 1.09, 1.32  | 38/1745                                       | 7.02            | 5.07, 9.72  |
|         | 39–41                            | 1785/571,880                                                     | 1.00            | [Reference] | 28/1249                                       | 6.72            | 4.62, 9.77  |
|         | 42–45                            | 155/50,414                                                       | 0.83            | 0.70, 0.98  | 0/11                                          | <sup>c</sup>    |             |
| Sweden  | <32                              | 83/18,517                                                        | 0.75            | 0.61, 0.93  | 13/427                                        | 4.82            | 2.80, 8.31  |
|         | 32–33                            | 109/18,419                                                       | 0.93            | 0.77, 1.12  | 14/420                                        | 5.04            | 2.98, 8.51  |
|         | 34–36                            | 772/104,842                                                      | 1.15            | 1.06, 1.23  | 93/2508                                       | 5.78            | 4.71, 7.10  |
|         | 37–38                            | 3294/458,726                                                     | 1.14            | 1.09, 1.18  | 264/7640                                      | 5.38            | 4.75, 6.09  |
|         | 39–41                            | 10841/1,713,160                                                  | 1.00            | [Reference] | 348/9845                                      | 4.93            | 4.44, 5.50  |
|         | 42–45                            | 1007/175,141                                                     | 0.89            | 0.83, 0.95  | 18/546                                        | 4.15            | 2.61, 6.59  |

FI, Finland; NO, Norway; SE, Sweden

<sup>a</sup> In Norway, analyses were restricted to those born in 1999 or later, as data on maternal pre-pregnancy diabetes subtypes are available only from 1999

<sup>b</sup> HR are adjusted for child's sex, birth year and birthweight z score and mother's age, parity, education level, and hypertensive disorders during pregnancy (model 2 without diabetes during pregnancy)

<sup>c</sup> Not enough individuals for the analysis

**ESM Table 8** Country-specific associations of combination of gestational age and maternal hypertensive disorders during pregnancy with risk of type 1 diabetes in offspring

| Country | Gestational age category (weeks) | Maternal hypertensive disorder during pregnancy |                 |             |                                     |                 |            |
|---------|----------------------------------|-------------------------------------------------|-----------------|-------------|-------------------------------------|-----------------|------------|
|         |                                  | No                                              |                 |             | Yes                                 |                 |            |
|         |                                  | Country: type 1 diabetes/total, <i>n</i>        |                 |             |                                     |                 |            |
|         |                                  | No                                              |                 |             | Yes                                 |                 |            |
|         |                                  | FI: 11,379/1,533,543                            |                 |             | FI: 947/119,853                     |                 |            |
|         |                                  | NO: 5994/1,261,984                              |                 |             | NO: 370/75,705                      |                 |            |
|         |                                  | SE: 16,779/2,500,027                            |                 |             | SE: 77/10,164                       |                 |            |
|         |                                  | Type 1 diabetes/<br>total, <i>n</i>             | HR <sup>a</sup> | 95% CI      | Type 1 diabetes/<br>total, <i>n</i> | HR <sup>a</sup> | 95% CI     |
| Finland | <32                              | 47/8726                                         | 0.83            | 0.62, 1.10  | 10/2679                             | 0.61            | 0.33, 1.14 |
|         | 32–33                            | 70/8388                                         | 1.13            | 0.89, 1.43  | 20/2524                             | 1.07            | 0.69, 1.67 |
|         | 34–36                            | 455/54,429                                      | 1.10            | 1.00, 1.21  | 102/11,527                          | 1.17            | 0.96, 1.42 |
|         | 37–38                            | 2302/263,711                                    | 1.17            | 1.11, 1.22  | 285/31,994                          | 1.22            | 1.08, 1.38 |
|         | 39–41                            | 8022/1,127,857                                  | 1.00            | [Reference] | 511/68,202                          | 1.09            | 1.00, 1.20 |
|         | 42–45                            | 483/70,432                                      | 0.96            | 0.88, 1.05  | 19/2927                             | 0.95            | 0.60, 1.48 |
| Norway  | <32                              | 21/7,936                                        | 0.55            | 0.36, 0.85  | 9/2470                              | 0.83            | 0.43, 1.61 |
|         | 32–33                            | 44/8,578                                        | 1.05            | 0.78, 1.41  | 11/2316                             | 0.99            | 0.55, 1.80 |
|         | 34–36                            | 272/50,555                                      | 1.10            | 0.97, 1.24  | 48/9507                             | 0.99            | 0.74, 1.32 |
|         | 37–38                            | 1068/196,307                                    | 1.17            | 1.10, 1.26  | 92/17,964                           | 0.99            | 0.86, 1.31 |
|         | 39–41                            | 4061/884,775                                    | 1.00            | [Reference] | 192/39,441                          | 1.06            | 0.92, 1.22 |
|         | 42–45                            | 528/113,833                                     | 0.85            | 0.78, 0.94  | 18/4007                             | 0.82            | 0.52, 1.31 |
| Sweden  | <32                              | 95/18,685                                       | 0.79            | 0.64, 0.96  | <5/259                              | 0.47            | 0.07, 3.37 |
|         | 32–33                            | 122/18,651                                      | 0.95            | 0.80, 1.13  | <5/188                              | 0.59            | 0.08, 4.19 |
|         | 34–36                            | 860/106,508                                     | 1.16            | 1.08, 1.24  | 5/842                               | 0.69            | 0.29, 1.67 |
|         | 37–38                            | 3541/463,835                                    | 1.14            | 1.09, 1.18  | 17/2531                             | 0.95            | 0.59, 1.52 |
|         | 39–41                            | 11139/1,717,129                                 | 1.00            | [Reference] | 50/5876                             | 1.27            | 0.96, 1.68 |
|         | 42–45                            | 1022/175,219                                    | 0.89            | 0.83, 0.95  | <5/468                              | 0.92            | 0.30, 2.84 |

FI, Finland; NO, Norway; SE, Sweden

<sup>a</sup>HR are adjusted for child's sex, birth year and birthweight z score and mother's age, parity, education level, and diabetes during pregnancy (model 2 without hypertensive disorders during pregnancy)

ESM Table 9. Cause-specific hazards of type 1 diabetes and death

| Country | Gestational age category (weeks) | Cause-specific hazards |                 |     |                                  |          |      |                              |                        |                         |        |              |  |
|---------|----------------------------------|------------------------|-----------------|-----|----------------------------------|----------|------|------------------------------|------------------------|-------------------------|--------|--------------|--|
|         |                                  | Total                  | Type 1 diabetes |     |                                  | Death    |      |                              | Cause-specific hazards |                         |        |              |  |
|         |                                  | <i>n</i>               | <i>n</i>        | %   | Age at diagnosis (years), median | <i>n</i> | %    | Age at death (years), median | Type 1 diabetes        | Death (competing event) |        |              |  |
|         |                                  |                        |                 |     |                                  |          |      | HR <sup>b</sup>              | 95% CI                 | HR <sup>b</sup>         | 95% CI |              |  |
| Finland | 23–27                            | 3343                   | 12              | 0.4 | 8.6                              | 915      | 27.4 | <0.1                         | 0.70                   | 0.40, 1.23              | 79.64  | 74.06, 85.65 |  |
|         | 28–31                            | 8062                   | 45              | 0.6 | 7.1                              | 492      | 6.1  | <0.1                         | 0.79                   | 0.59, 1.06              | 12.82  | 11.65, 14.11 |  |
|         | 32–33                            | 10,912                 | 90              | 0.8 | 7.2                              | 256      | 2.4  | <0.1                         | 1.10                   | 0.90, 1.36              | 4.89   | 4.30, 5.55   |  |
|         | 34–36                            | 65,956                 | 557             | 0.8 | 7.9                              | 810      | 1.2  | 0.3                          | 1.10                   | 1.01, 1.20              | 2.56   | 2.38, 2.76   |  |
|         | 37–38                            | 295,705                | 2587            | 0.9 | 7.9                              | 1745     | 0.6  | 2.9                          | 1.16                   | 1.11, 1.22              | 1.28   | 1.21, 1.35   |  |
|         | 39–41                            | 1,196,059              | 8533            | 0.7 | 8.2                              | 5227     | 0.4  | 8.3                          | 1.00                   | [Reference]             | 1.00   | [Reference]  |  |
|         | 42–45                            | 73,359                 | 502             | 0.7 | 8.8                              | 332      | 0.5  | 7.9                          | 0.96                   | 0.87, 1.05              | 1.07   | 0.96, 1.20   |  |
| Norway  | 23–27                            | 2480                   | 6               | 0.2 | 14.1                             | 98       | 4.0  | <0.1                         | 0.56                   | 0.25, 1.26              | 25.02  | 20.34, 30.77 |  |
|         | 28–31                            | 7926                   | 24              | 0.3 | 13.5                             | 43       | 0.5  | 0.2                          | 0.63                   | 0.42, 0.95              | 2.84   | 2.09, 3.86   |  |
|         | 32–33                            | 10,894                 | 55              | 0.5 | 11.7                             | 57       | 0.5  | 3.8                          | 1.04                   | 0.80, 1.36              | 2.70   | 2.07, 3.53   |  |
|         | 34–36                            | 60,062                 | 320             | 0.5 | 12.3                             | 159      | 0.3  | 11.1                         | 1.09                   | 0.97, 1.22              | 1.39   | 1.18, 1.65   |  |
|         | 37–38                            | 214,271                | 1160            | 0.5 | 12.3                             | 418      | 0.2  | 17.9                         | 1.16                   | 1.09, 1.24              | 1.10   | 0.98, 1.22   |  |
|         | 39–41                            | 924,216                | 4253            | 0.5 | 13.1                             | 1648     | 0.2  | 19.3                         | 1.00                   | [Reference]             | 1.00   | [Reference]  |  |
|         | 42–45                            | 117,840                | 546             | 0.5 | 14.7                             | 280      | 0.2  | 20.5                         | 0.85                   | 0.78, 0.93              | 1.08   | 0.95, 1.23   |  |
| Sweden  | 23–27                            | 5042                   | 17              | 0.3 | 11.8                             | 660      | 13.1 | <0.1                         | 0.61                   | 0.38, 0.98              | 51.75  | 47.61, 56.26 |  |
|         | 28–31                            | 13,902                 | 79              | 0.6 | 12.2                             | 332      | 2.4  | <0.1                         | 0.83                   | 0.66, 1.03              | 7.20   | 6.43, 8.06   |  |
|         | 32–33                            | 18,839                 | 123             | 0.7 | 10.6                             | 234      | 1.2  | 0.2                          | 0.94                   | 0.79, 1.12              | 3.79   | 3.32, 4.32   |  |
|         | 34–36                            | 107,350                | 865             | 0.8 | 10.3                             | 688      | 0.6  | 1.1                          | 1.15                   | 1.07, 1.23              | 2.00   | 1.84, 2.17   |  |
|         | 37–38                            | 466,366                | 3558            | 0.8 | 10.6                             | 1726     | 0.4  | 11.1                         | 1.13                   | 1.09, 1.18              | 1.23   | 1.17, 1.30   |  |
|         | 39–41                            | 1,723,005              | 11,189          | 0.7 | 10.8                             | 4957     | 0.3  | 16.2                         | 1.00                   | [Reference]             | 1.00   | [Reference]  |  |
|         | 42–45                            | 175,687                | 1025            | 0.6 | 10.6                             | 549      | 0.3  | 14.7                         | 0.89                   | 0.83, 0.95              | 1.09   | 0.99, 1.19   |  |

<sup>a</sup>In Norway and Sweden, those who died before the start of the follow-up (year 2008 in Norway and 1997 in Sweden) were excluded from the study population

<sup>b</sup>HR are adjusted for child's sex and birth year and mother's age, education level, parity, diabetes during pregnancy and hypertensive disorders during pregnancy (model 2).

**ESM Table 10.** Association between gestational age and the risk of type 1 diabetes – country-specific and pooled adjusted estimates from analyses investigating death as potential source of informative censoring with different assumptions

| Country | Gestational age category (weeks) | Type 1 diabetes among those who did not die |     | Magnitude of cumulative incidence of type 1 diabetes diagnosis assigned to those who died <sup>a</sup> |             |                                                |             |                                                             |             |                                                             |             |                                                             |             |
|---------|----------------------------------|---------------------------------------------|-----|--------------------------------------------------------------------------------------------------------|-------------|------------------------------------------------|-------------|-------------------------------------------------------------|-------------|-------------------------------------------------------------|-------------|-------------------------------------------------------------|-------------|
|         |                                  |                                             |     | 0.2 times lower than incidence among those who did not die                                             |             | Equal to incidence among those who did not die |             | 1.5 times higher than incidence among those who did not die |             | 2.0 times higher than incidence among those who did not die |             | 2.5 times higher than incidence among those who did not die |             |
|         |                                  |                                             |     | <i>n</i>                                                                                               | %           | HR <sup>b</sup>                                | 95% CI      | HR <sup>b</sup>                                             | 95% CI      | HR <sup>b</sup>                                             | 95% CI      | HR <sup>b</sup>                                             | 95% CI      |
| Finland | 23–27                            | 12                                          | 0.5 | 1.04                                                                                                   | 0.66, 1.65  | 1.21                                           | 0.79, 1.86  | 1.33                                                        | 0.88, 2.00  | 1.55                                                        | 1.06, 2.27  | 1.66                                                        | 1.15, 2.40  |
|         | 28–31                            | 45                                          | 0.6 | 0.86                                                                                                   | 0.65, 1.14  | 0.86                                           | 0.65, 1.14  | 0.93                                                        | 0.71, 1.22  | 0.96                                                        | 0.73, 1.25  | 1.01                                                        | 0.78, 1.31  |
|         | 32–33                            | 90                                          | 0.8 | 1.11                                                                                                   | 0.90, 1.37  | 1.12                                           | 0.91, 1.38  | 1.12                                                        | 0.91, 1.38  | 1.13                                                        | 0.92, 1.39  | 1.13                                                        | 0.92, 1.39  |
|         | 34–36                            | 557                                         | 0.9 | 1.10                                                                                                   | 1.01, 1.20  | 1.10                                           | 1.01, 1.21  | 1.10                                                        | 1.01, 1.20  | 1.11                                                        | 1.02, 1.21  | 1.12                                                        | 1.03, 1.22  |
|         | 37–38                            | 2587                                        | 0.9 | 1.16                                                                                                   | 1.11, 1.22  | 1.16                                           | 1.11, 1.22  | 1.16                                                        | 1.11, 1.22  | 1.16                                                        | 1.11, 1.21  | 1.16                                                        | 1.11, 1.22  |
|         | 39–41                            | 8533                                        | 0.7 | 1.00                                                                                                   | [Reference] | 1.00                                           | [Reference] | 1.00                                                        | [Reference] | 1.00                                                        | [Reference] | 1.00                                                        | [Reference] |
|         | 42–45                            | 502                                         | 0.7 | 0.96                                                                                                   | 0.87, 1.05  | 0.96                                           | 0.87, 1.05  | 0.96                                                        | 0.87, 1.05  | 0.96                                                        | 0.87, 1.04  | 0.95                                                        | 0.87, 1.04  |
|         | Total                            | 12,326                                      | 0.8 |                                                                                                        |             |                                                |             |                                                             |             |                                                             |             |                                                             |             |
| Norway  | 23–27                            | 6                                           | 0.3 | 0.63                                                                                                   | 0.30, 1.32  | 0.63                                           | 0.30, 1.32  | 0.63                                                        | 0.30, 1.32  | 0.63                                                        | 0.30, 1.32  | 0.72                                                        | 0.36, 1.44  |
|         | 28–31                            | 24                                          | 0.3 | 0.61                                                                                                   | 0.41, 0.92  | 0.61                                           | 0.41, 0.92  | 0.61                                                        | 0.41, 0.92  | 0.61                                                        | 0.41, 0.92  | 0.61                                                        | 0.41, 0.92  |
|         | 32–33                            | 55                                          | 0.5 | 1.03                                                                                                   | 0.78, 1.34  | 1.03                                           | 0.78, 1.34  | 1.02                                                        | 0.78, 1.34  | 1.02                                                        | 0.78, 1.34  | 1.02                                                        | 0.78, 1.34  |
|         | 34–36                            | 320                                         | 0.5 | 1.08                                                                                                   | 0.96, 1.21  | 1.08                                           | 0.96, 1.21  | 1.08                                                        | 0.96, 1.21  | 1.08                                                        | 0.96, 1.21  | 1.08                                                        | 0.96, 1.21  |
|         | 37–38                            | 1160                                        | 0.5 | 1.15                                                                                                   | 1.08, 1.23  | 1.15                                           | 1.08, 1.23  | 1.15                                                        | 1.08, 1.23  | 1.15                                                        | 1.08, 1.23  | 1.15                                                        | 1.08, 1.23  |
|         | 39–41                            | 4253                                        | 0.5 | 1.00                                                                                                   | [Reference] | 1.00                                           | [Reference] | 1.00                                                        | [Reference] | 1.00                                                        | [Reference] | 1.00                                                        | [Reference] |
|         | 42–45                            | 546                                         | 0.5 | 0.87                                                                                                   | 0.79, 0.95  | 0.87                                           | 0.79, 0.95  | 0.87                                                        | 0.79, 0.95  | 0.87                                                        | 0.79, 0.95  | 0.87                                                        | 0.79, 0.95  |
|         | Total                            | 6364                                        | 0.5 |                                                                                                        |             |                                                |             |                                                             |             |                                                             |             |                                                             |             |
| Sweden  | 23–27                            | 17                                          | 0.4 | 0.76                                                                                                   | 0.49, 1.16  | 0.76                                           | 0.49, 1.16  | 0.79                                                        | 0.52, 1.20  | 0.93                                                        | 0.63, 1.37  | 0.93                                                        | 0.63, 1.37  |
|         | 28–31                            | 79                                          | 0.6 | 0.86                                                                                                   | 0.69, 1.07  | 0.86                                           | 0.69, 1.07  | 0.86                                                        | 0.69, 1.07  | 0.88                                                        | 0.71, 1.09  | 0.88                                                        | 0.71, 1.09  |
|         | 32–33                            | 123                                         | 0.7 | 0.95                                                                                                   | 0.80, 1.13  | 0.95                                           | 0.80, 1.13  | 0.96                                                        | 0.80, 1.14  | 0.96                                                        | 0.81, 1.15  | 0.96                                                        | 0.81, 1.15  |
|         | 34–36                            | 865                                         | 0.8 | 1.16                                                                                                   | 1.08, 1.24  | 1.16                                           | 1.08, 1.24  | 1.16                                                        | 1.08, 1.24  | 1.16                                                        | 1.08, 1.24  | 1.16                                                        | 1.08, 1.24  |
|         | 37–38                            | 3558                                        | 0.8 | 1.14                                                                                                   | 1.09, 1.18  | 1.14                                           | 1.09, 1.18  | 1.14                                                        | 1.09, 1.18  | 1.13                                                        | 1.09, 1.18  | 1.13                                                        | 1.09, 1.18  |
|         | 39–41                            | 11,189                                      | 0.7 | 1.00                                                                                                   | [Reference] | 1.00                                           | [Reference] | 1.00                                                        | [Reference] | 1.00                                                        | [Reference] | 1.00                                                        | [Reference] |
|         | 42–45                            | 1025                                        | 0.6 | 0.89                                                                                                   | 0.83, 0.95  | 0.89                                           | 0.83, 0.95  | 0.89                                                        | 0.83, 0.95  | 0.89                                                        | 0.84, 0.95  | 0.89                                                        | 0.84, 0.95  |
|         | Total                            | 16,856                                      | 0.7 |                                                                                                        |             |                                                |             |                                                             |             |                                                             |             |                                                             |             |
| Pooled  | 23–27                            | 35                                          | 0.3 | 0.84                                                                                                   | 0.63, 1.12  | 0.90                                           | 0.68, 1.20  | 0.96                                                        | 0.73, 1.27  | 1.12                                                        | 0.87, 1.44  | 1.17                                                        | 0.92, 1.51  |
|         | 28–31                            | 148                                         | 0.5 | 0.82                                                                                                   | 0.70, 0.96  | 0.82                                           | 0.70, 0.96  | 0.84                                                        | 0.72, 0.98  | 0.86                                                        | 0.74, 1.00  | 0.88                                                        | 0.75, 1.02  |
|         | 32–33                            | 268                                         | 0.7 | 1.02                                                                                                   | 0.90, 1.14  | 1.02                                           | 0.90, 1.15  | 1.02                                                        | 0.91, 1.16  | 1.03                                                        | 0.91, 1.16  | 1.03                                                        | 0.91, 1.16  |
|         | 34–36                            | 1742                                        | 0.7 | 1.13                                                                                                   | 1.07, 1.18  | 1.13                                           | 1.07, 1.18  | 1.13                                                        | 1.07, 1.18  | 1.13                                                        | 1.08, 1.19  | 1.13                                                        | 1.08, 1.19  |
|         | 37–38                            | 7305                                        | 0.7 | 1.15                                                                                                   | 1.12, 1.18  | 1.15                                           | 1.12, 1.18  | 1.15                                                        | 1.12, 1.18  | 1.15                                                        | 1.12, 1.18  | 1.14                                                        | 1.11, 1.18  |
|         | 39–41                            | 23,964                                      | 0.6 | 1.00                                                                                                   | [Reference] | 1.00                                           | [Reference] | 1.00                                                        | [Reference] | 1.00                                                        | [Reference] | 1.00                                                        | [Reference] |
|         | 42–45                            | 2073                                        | 0.6 | 0.90                                                                                                   | 0.86, 0.95  | 0.90                                           | 0.86, 0.95  | 0.90                                                        | 0.86, 0.95  | 0.90                                                        | 0.86, 0.94  | 0.90                                                        | 0.86, 0.94  |
|         | Total                            | 35,535                                      | 0.6 |                                                                                                        |             |                                                |             |                                                             |             |                                                             |             |                                                             |             |

<sup>a</sup> Artificial type 1 diabetes diagnoses are randomly assigned to those who died during the study period <sup>b</sup> HR are adjusted for child's sex and birth year and mother's age, education level, parity, diabetes during pregnancy and hypertensive disorders during pregnancy (model 2).



**ESM Table 11** Association between gestational age and the risk of type 1 diabetes. Comparison of the results from the main and sensitivity analysis of different time periods according to the start of the availability of type 1 diabetes diagnosis data in Sweden (since 1997) and in Norway (since 2008)

| Country        | Birth years                                |                                     |                                      |                                       |                 |                |                                           |                                      |                                       |                 |                |                                           |                                      |                                       |                 |
|----------------|--------------------------------------------|-------------------------------------|--------------------------------------|---------------------------------------|-----------------|----------------|-------------------------------------------|--------------------------------------|---------------------------------------|-----------------|----------------|-------------------------------------------|--------------------------------------|---------------------------------------|-----------------|
|                | 1987–2016 (main analysis)                  |                                     |                                      |                                       |                 | 1997–2016      |                                           |                                      |                                       |                 | 2008–2016      |                                           |                                      |                                       |                 |
|                | Gestation<br>al age<br>category<br>(weeks) | Type 1 diabetes/<br>total, <i>n</i> | Follow-<br>up time<br>(years),<br>md | Age at<br>diagnosis<br>(years),<br>md | HR <sup>a</sup> | 95% CI         | Type 1<br>diabetes/<br>total,<br><i>n</i> | Follow-<br>up time<br>(years),<br>md | Age at<br>diagnosis<br>(years),<br>md | HR <sup>a</sup> | 95% CI         | Type 1<br>diabetes/<br>total,<br><i>n</i> | Follow-<br>up time<br>(years),<br>md | Age at<br>diagnosis<br>(years),<br>md | HR <sup>a</sup> |
| <b>Finland</b> |                                            |                                     |                                      |                                       |                 |                |                                           |                                      |                                       |                 |                |                                           |                                      |                                       |                 |
| <32            | 57/11,405                                  | 12.8                                | 7.4                                  | 0.77                                  | 0.59, 1.00      | 26/7438        | 9.1                                       | 6.6                                  | 0.63                                  | 0.43, 0.93      | 6/3220         | 4.4                                       | 4.0                                  | 0.80                                  | 0.36, 1.80      |
| 32–33          | 90/10,912                                  | 14.6                                | 7.2                                  | 1.10                                  | 0.90, 1.36      | 53/7277        | 10.0                                      | 5.9                                  | 1.17                                  | 0.90, 1.54      | 12/3131        | 4.5                                       | 4.8                                  | 1.50                                  | 0.85, 2.68      |
| 34–36          | 557/65,956                                 | 15.3                                | 7.9                                  | 1.10                                  | 1.01, 1.20      | 307/42,590     | 10.0                                      | 6.1                                  | 1.14                                  | 1.01, 1.29      | 52/18,868      | 4.5                                       | 3.3                                  | 1.06                                  | 0.80, 1.42      |
| 37–38          | 2587/295,705                               | 15.7                                | 7.9                                  | 1.16                                  | 1.11, 1.22      | 1357/187,449   | 10.1                                      | 5.9                                  | 1.18                                  | 1.11, 1.26      | 239/81,801     | 4.6                                       | 3.4                                  | 1.21                                  | 1.04, 1.40      |
| 39–41          | 8533/1,196,059                             | 15.7                                | 8.2                                  | 1.00                                  | [Reference]     | 4316/754,212   | 9.9                                       | 6.4                                  | 1.00                                  | [Reference]     | 761/336,843    | 4.7                                       | 3.4                                  | 1.00                                  | [Reference]     |
| 42–45          | 502/73,359                                 | 15.4                                | 8.8                                  | 0.96                                  | 0.87, 1.05      | 248/46,657     | 10.0                                      | 6.7                                  | 0.92                                  | 0.81, 1.04      | 42/20,150      | 5.1                                       | 3.2                                  | 0.87                                  | 0.64, 1.19      |
| <b>Norway</b>  |                                            |                                     |                                      |                                       |                 |                |                                           |                                      |                                       |                 |                |                                           |                                      |                                       |                 |
| <32            | 30/10,406                                  | 10.0                                | 13.9                                 | 0.62                                  | 0.43, 0.89      |                |                                           |                                      |                                       |                 | <5/3269        | 5.5                                       | 4.0                                  | 0.43                                  | 0.11, 1.74      |
| 32–33          | 44/10,894                                  | 10.0                                | 11.7                                 | 1.04                                  | 0.80, 1.36      |                |                                           |                                      |                                       |                 | 6/3204         | 5.8                                       | 3.9                                  | 1.21                                  | 0.54, 2.73      |
| 34–36          | 320/60,062                                 | 10.0                                | 12.3                                 | 1.09                                  | 0.97, 1.22      |                |                                           |                                      |                                       |                 | 40/17979       | 5.7                                       | 5.1                                  | 1.48                                  | 1.06, 2.06      |
| 37–38          | 1160/214,271                               | 10.0                                | 12.3                                 | 1.16                                  | 1.09, 1.24      |                |                                           |                                      |                                       |                 | 131/69,520     | 5.7                                       | 3.8                                  | 1.28                                  | 1.05, 1.57      |
| 39–41          | 4253/924,216                               | 10.0                                | 13.1                                 | 1.00                                  | [Reference]     |                |                                           |                                      |                                       |                 | 397/286,547    | 5.6                                       | 4.3                                  | 1.00                                  | [Reference]     |
| 42–45          | 546/117,840                                | 10.0                                | 14.7                                 | 0.85                                  | 0.78, 0.93      |                |                                           |                                      |                                       |                 | 19/18,315      | 6.6                                       | 5.6                                  | 0.65                                  | 0.41, 1.03      |
| <b>Sweden</b>  |                                            |                                     |                                      |                                       |                 |                |                                           |                                      |                                       |                 |                |                                           |                                      |                                       |                 |
| <32            | 96/18,944                                  | 14.2                                | 12.1                                 | 0.78                                  | 0.64, 0.96      | 48/12,893      | 9.7                                       | 8.4                                  | 0.77                                  | 0.58, 1.02      | 10/6025        | 5.4                                       | 3.7                                  | 0.86                                  | 0.46, 1.61      |
| 32–33          | 123/18,839                                 | 15.7                                | 10.6                                 | 0.94                                  | 0.79, 1.12      | 71/11,994      | 10.5                                      | 8.4                                  | 1.13                                  | 0.89, 1.44      | 12/5474        | 5.5                                       | 4.4                                  | 1.07                                  | 0.61, 1.90      |
| 34–36          | 865/107,350                                | 16.0                                | 10.6                                 | 1.15                                  | 1.07, 1.23      | 419/67,050     | 10.5                                      | 7.6                                  | 1.28                                  | 1.06, 1.30      | 75/30,708      | 5.6                                       | 3.8                                  | 1.16                                  | 0.92, 1.47      |
| 37–38          | 3558/466,366                               | 15.6                                | 10.3                                 | 1.13                                  | 1.09, 1.18      | 1729/295,975   | 10.5                                      | 7.6                                  | 1.15                                  | 1.09, 1.21      | 340/138,037    | 5.5                                       | 4.0                                  | 1.23                                  | 1.08, 1.39      |
| 39–41          | 11189/1,723,005                            | 15.8                                | 10.6                                 | 1.00                                  | [Reference]     | 5222/1,082,747 | 10.3                                      | 7.7                                  | 1.00                                  | [Reference]     | 967/516,482    | 5.5                                       | 3.9                                  | 1.00                                  | [Reference]     |
| 42–45          | 1025/175,687                               | 16.0                                | 10.8                                 | 0.89                                  | 0.83, 0.95      | 476/11,1255    | 10.7                                      | 7.9                                  | 0.87                                  | 0.79, 0.95      | 81/50,581      | 5.4                                       | 3.5                                  | 0.85                                  | 0.68, 1.07      |
| <b>Pooled</b>  |                                            |                                     |                                      |                                       |                 |                |                                           |                                      |                                       |                 |                |                                           |                                      |                                       |                 |
| <32            | 183/40,755                                 |                                     |                                      | 0.75                                  | 0.65, 0.87      |                |                                           |                                      |                                       |                 | <20/12,514     |                                           |                                      | 0.78                                  | 0.49, 1.24      |
| 32–33          | 257/40,645                                 |                                     |                                      | 1.01                                  | 0.90, 1.14      |                |                                           |                                      |                                       |                 | 30/11,809      |                                           |                                      | 1.25                                  | 0.87, 1.80      |
| 34–36          | 1742/233,368                               |                                     |                                      | 1.12                                  | 1.07, 1.18      |                |                                           |                                      |                                       |                 | 167/67,555     |                                           |                                      | 1.19                                  | 1.02, 1.40      |
| 37–38          | 7305/976,342                               |                                     |                                      | 1.15                                  | 1.11, 1.18      |                |                                           |                                      |                                       |                 | 710/215,737    |                                           |                                      | 1.23                                  | 1.13, 1.34      |
| 39–41          | 23964/3,843,280                            |                                     |                                      | 1.00                                  | [Reference]     |                |                                           |                                      |                                       |                 | 2125/1,139,872 |                                           |                                      | 1.00                                  | [Reference]     |
| 42–45          | 2073/366,886                               |                                     |                                      | 0.90                                  | 0.85, 0.94      |                |                                           |                                      |                                       |                 | 142/89,046     |                                           |                                      | 0.82                                  | 0.70, 0.98      |

Md, median

<sup>a</sup> HR are adjusted for child's sex, birth year and birthweight z score and mother's age, education level, parity, diabetes during pregnancy and hypertensive disorder during pregnancy (model 2)

**ESM Table 12** Country-specific and pooled associations between gestational age and the risk of type 1 diabetes from the sibling analyses

| Country | Gestational age category (weeks) | Type 1 diabetes/ total, <i>n</i> | HR <sup>a</sup> | 95% CI      | Number of individuals included and excluded from the sibling analyses                |
|---------|----------------------------------|----------------------------------|-----------------|-------------|--------------------------------------------------------------------------------------|
| Finland | <32                              | 41/7780                          | 0.65            | 0.40, 1.05  | Main analysis cohort <i>n</i> = 1,653,396                                            |
|         | 32–33                            | 70/8059                          | 1.07            | 0.73, 1.56  | No father's identification number <i>n</i> = 23,561 (type 1 diabetes <i>n</i> = 138) |
|         | 34–36                            | 415/49,502                       | 1.07            | 0.91, 1.25  | No full siblings in the data <i>n</i> = 370,972 (type 1 diabetes <i>n</i> = 2784)    |
|         | 37–38                            | 1983/226,585                     | 1.14            | 1.05, 1.24  | Final full sibling cohort <i>n</i> = 1,258,863 (76%)                                 |
|         | 39–41                            | 6543/913,933                     | 1.00            | [Reference] |                                                                                      |
|         | 42–45                            | 352/53,004                       | 0.98            | 0.84, 1.05  |                                                                                      |
|         | Total                            | 9404/1,258,863                   |                 |             |                                                                                      |
| Norway  | <32                              | 16/7186                          | 1.12            | 0.52, 2.41  | Main analysis cohort <i>n</i> = 1,337,689                                            |
|         | 32–33                            | 41/8077                          | 1.61            | 0.93, 2.78  | No father's identification number <i>n</i> = 12,041 (type 1 diabetes <i>n</i> = 28)  |
|         | 34–36                            | 237/44,621                       | 0.87            | 0.71, 1.07  | No full siblings in the data <i>n</i> = 331,047 (type 1 diabetes <i>n</i> = 1628)    |
|         | 37–38                            | 864/160,699                      | 1.05            | 0.94, 1.18  | Final full sibling cohort <i>n</i> = 994,601 (74%)                                   |
|         | 39–41                            | 3176/690,384                     | 1.00            | [Reference] |                                                                                      |
|         | 42–45                            | 374/83,634                       | 0.88            | 0.75, 1.02  |                                                                                      |
|         | Total                            | 4708/994,601                     |                 |             |                                                                                      |
| Sweden  | <32                              | 71/13,508                        | 0.88            | 0.60, 1.31  | Main analysis cohort <i>n</i> = 2,510,191                                            |
|         | 32–33                            | 88/14,199                        | 0.94            | 0.66, 1.33  | No father's identification number <i>n</i> = 14,691 (type 1 diabetes <i>n</i> = 49)  |
|         | 34–36                            | 654/81,574                       | 1.19            | 1.04, 1.35  | No full siblings in the data <i>n</i> = 578,936 (type 1 diabetes <i>n</i> = 3830)    |
|         | 37–38                            | 2763/365,452                     | 1.11            | 1.04, 1.19  | Final full sibling cohort <i>n</i> = 1,916,564 (76%)                                 |
|         | 39–41                            | 8637/1,322,338                   | 1.00            | [Reference] |                                                                                      |
|         | 42–45                            | 764/128,493                      | 0.97            | 0.87, 1.08  |                                                                                      |
|         | Total                            | 12,977/1,916,564                 |                 |             |                                                                                      |
| Pooled  | <32                              | 128/28,474                       | 0.82            | 0.62, 1.09  |                                                                                      |
|         | 32–33                            | 199/30,335                       | 1.09            | 0.86, 1.37  |                                                                                      |
|         | 34–36                            | 1306/175,697                     | 1.08            | 0.99, 1.18  |                                                                                      |
|         | 37–38                            | 5610/752,736                     | 1.11            | 1.06, 1.16  |                                                                                      |
|         | 39–41                            | 18,356/2,926,655                 | 1.00            | [Reference] |                                                                                      |
|         | 42–45                            | 1490/265,131                     | 0.96            | 0.89, 1.02  |                                                                                      |
|         | Total                            | 27,089/4,179,028                 |                 |             |                                                                                      |

<sup>a</sup> HRs are adjusted for child's sex and birth year and mother's age, education level, parity, diabetes during pregnancy and hypertensive disorders during pregnancy (model 2)

**ESM Table 13.** Association between gestational age and the risk of type 1 diabetes – country-specific and pooled adjusted estimates using Maršál reference for calculating birthweight z scores

| Country                                                    | Gestational age category (weeks) | Type 1 diabetes, <i>n</i> | Total, <i>n</i> | Model Country: <i>n</i> |             |
|------------------------------------------------------------|----------------------------------|---------------------------|-----------------|-------------------------|-------------|
|                                                            |                                  |                           |                 | HR <sup>a</sup>         | 95% CI      |
| Model 2<br>FI: 1,652,345<br>NO: 1,322,124<br>SE: 2,498,229 |                                  |                           |                 |                         |             |
| Finland                                                    | 23–27                            | 12                        | 2678            | 0.85                    | 0.48, 1.50  |
|                                                            | 28–31                            | 51                        | 8298            | 0.92                    | 0.70, 1.21  |
|                                                            | 32–33                            | 92                        | 11,239          | 1.12                    | 0.91, 1.38  |
|                                                            | 34–36                            | 558                       | 65,573          | 1.12                    | 1.02, 1.22  |
|                                                            | 37–38                            | 2588                      | 293,144         | 1.16                    | 1.11, 1.21  |
|                                                            | 39–41                            | 8533                      | 1,187,570       | 1.00                    | [Reference] |
|                                                            | 42–45                            | 495                       | 71,514          | 0.98                    | 0.89, 1.07  |
| Norway                                                     | 23–27                            | 6                         | 2153            | 0.69                    | 0.31, 1.54  |
|                                                            | 28–31                            | 24                        | 8249            | 0.66                    | 0.44, 0.98  |
|                                                            | 32–33                            | 55                        | 11,275          | 1.05                    | 0.81, 1.38  |
|                                                            | 34–36                            | 317                       | 59,855          | 1.10                    | 0.98, 1.23  |
|                                                            | 37–38                            | 1160                      | 213,125         | 1.15                    | 1.11, 1.23  |
|                                                            | 39–41                            | 4253                      | 920,258         | 1.00                    | [Reference] |
|                                                            | 42–45                            | 449                       | 100,945         | 0.86                    | 0.78, 0.94  |
| Sweden                                                     | 23–27                            | 16                        | 4106            | 0.69                    | 0.42, 1.12  |
|                                                            | 28–31                            | 80                        | 13,950          | 0.88                    | 0.70, 1.09  |
|                                                            | 32–33                            | 124                       | 18,808          | 0.98                    | 0.82, 1.17  |
|                                                            | 34–36                            | 861                       | 106,246         | 1.16                    | 1.08, 1.25  |
|                                                            | 37–38                            | 3558                      | 462804          | 1.13                    | 1.09, 1.17  |
|                                                            | 39–41                            | 11,181                    | 1,711,807       | 1.00                    | [Reference] |
|                                                            | 42–45                            | 942                       | 163740          | 0.90                    | 0.84, 0.96  |
| Pooled                                                     | 23–27                            | 34                        | 8937            | 0.74                    | 0.53, 1.04  |
|                                                            | 28–31                            | 155                       | 30,497          | 0.85                    | 0.73, 1.00  |
|                                                            | 32–33                            | 271                       | 41,322          | 1.04                    | 0.92, 1.17  |
|                                                            | 34–36                            | 1736                      | 231,674         | 1.14                    | 1.08, 1.19  |
|                                                            | 37–38                            | 7306                      | 969,073         | 1.14                    | 1.12, 1.17  |
|                                                            | 39–41                            | 23,967                    | 3,819,635       | 1.00                    | [Reference] |
|                                                            | 42–45                            | 1886                      | 336,199         | 0.91                    | 0.87, 0.95  |

FI, Finland; NO, Norway; SE, Sweden

<sup>a</sup> HRs are adjusted for child's sex, birth year and birthweight z score calculated according to Maršál et al [23] and mother's age, education level, parity, diabetes during pregnancy and hypertensive disorders during pregnancy (model 2)

**ESM Table 14** Country-specific and pooled associations of combinations of gestational age and birthweight z score according to Maršál reference with the risk of type 1 diabetes

| Country | Gestational age category (weeks) | Birthweight z score category <sup>a</sup>          |            |                                                         |            |                                                          |            |                                                          |             |                                                          |             |                                                     |            |
|---------|----------------------------------|----------------------------------------------------|------------|---------------------------------------------------------|------------|----------------------------------------------------------|------------|----------------------------------------------------------|-------------|----------------------------------------------------------|-------------|-----------------------------------------------------|------------|
|         |                                  | Country: Type 1 diabetes/total, n                  |            |                                                         |            |                                                          |            |                                                          |             |                                                          |             |                                                     |            |
|         |                                  | < -2                                               |            | -2 to < -1                                              |            | -1 to < 0                                                |            | 0 to < +1                                                |             | +1 to < +2                                               |             | ≥ +2                                                |            |
|         |                                  | FI: 327/58,247<br>NO: 219/54,404<br>SE: 316/51,213 |            | FI: 1529/236,004<br>NO: 807/198,679<br>SE: 1713/282,483 |            | FI: 3734/533,417<br>NO: 1895/425,827<br>SE: 5195/810,299 |            | FI: 3978/511,617<br>NO: 1943/398,671<br>SE: 5919/836,001 |             | FI: 2257/265,310<br>NO: 1134/201,802<br>SE: 2772/386,606 |             | FI: 504/47,750<br>NO: 266/42,741<br>SE: 941/116,589 |            |
|         |                                  | HR <sup>b</sup>                                    | 95% CI     | HR <sup>b</sup>                                         | 95% CI     | HR <sup>b</sup>                                          | 95% CI     | HR <sup>b</sup>                                          | 95% CI      | HR <sup>b</sup>                                          | 95% CI      | HR <sup>b</sup>                                     | 95% CI     |
| Finland | <32                              | 0.62                                               | 0.37, 1.04 | 1.03                                                    | 0.67, 1.59 | 0.78                                                     | 0.48, 1.28 | 0.65                                                     | 0.31, 1.37  | c                                                        | c           | 0.92                                                | 0.34, 2.45 |
|         | 32–33                            | 0.63                                               | 0.35, 1.11 | 0.78                                                    | 0.48, 1.25 | 1.32                                                     | 0.94, 1.86 | 0.79                                                     | 0.45, 1.39  | 2.72                                                     | 0.86, 5.07  | 1.17                                                | 0.58, 2.35 |
|         | 34–36                            | 0.53                                               | 0.37, 0.76 | 1.07                                                    | 0.88, 1.31 | 1.07                                                     | 0.92, 1.26 | 1.10                                                     | 0.93, 1.30  | 1.10                                                     | 0.88, 1.38  | 1.27                                                | 0.95, 1.70 |
|         | 37–38                            | 0.89                                               | 0.72, 1.10 | 0.92                                                    | 0.82, 1.05 | 1.07                                                     | 0.99, 1.17 | 1.14                                                     | 1.05, 1.24  | 1.25                                                     | 1.15, 1.37  | 1.17                                                | 0.99, 1.39 |
|         | 39–41                            | 0.80                                               | 0.69, 0.94 | 0.87                                                    | 0.81, 0.94 | 0.92                                                     | 0.87, 0.97 | 1.00                                                     | [Reference] | 1.01                                                     | 0.95, 1.08  | 1.10                                                | 0.97, 1.25 |
|         | 42–45                            | 0.66                                               | 0.37, 0.17 | 0.84                                                    | 0.68, 1.04 | 0.90                                                     | 0.78, 1.05 | 1.01                                                     | 0.86, 1.19  | 0.97                                                     | 0.73, 1.29  | 0.89                                                | 0.50, 1.62 |
| Norway  | <32                              | 0.50                                               | 0.25, 1.00 | 0.37                                                    | 0.15, 0.88 | 0.90                                                     | 0.51, 1.58 | 0.49                                                     | 0.15, 1.51  | c                                                        | c           | 0.57                                                | 0.14, 2.29 |
|         | 32–33                            | 0.50                                               | 0.22, 1.11 | 1.06                                                    | 0.64, 1.77 | 0.89                                                     | 0.52, 1.51 | 0.85                                                     | 0.42, 1.69  | 1.66                                                     | 0.62, 4.43  | 1.50                                                | 0.75, 3.00 |
|         | 34–36                            | 1.03                                               | 0.73, 1.44 | 0.83                                                    | 0.62, 1.11 | 0.98                                                     | 0.78, 1.22 | 1.25                                                     | 1.01, 1.56  | 0.96                                                     | 0.70, 1.31  | 0.97                                                | 0.66, 1.42 |
|         | 37–38                            | 0.74                                               | 0.54, 1.03 | 0.87                                                    | 0.73, 1.05 | 1.07                                                     | 0.95, 1.21 | 1.09                                                     | 0.97, 1.23  | 1.34                                                     | 1.18, 1.53  | 1.24                                                | 0.98, 1.58 |
|         | 39–41                            | 0.74                                               | 0.61, 0.90 | 0.82                                                    | 0.74, 0.91 | 0.90                                                     | 0.83, 0.97 | 1.00                                                     | [Reference] | 1.08                                                     | 0.99, 1.18  | 1.03                                                | 0.87, 1.23 |
|         | 42–45                            | 0.80                                               | 0.54, 1.18 | 0.71                                                    | 0.57, 0.89 | 0.79                                                     | 0.67, 0.94 | 0.80                                                     | 0.67, 0.96  | 0.86                                                     | 0.64, 1.16  | 0.85                                                | 0.50, 1.44 |
| Sweden  | <32                              | 0.58                                               | 0.35, 0.96 | 1.30                                                    | 0.91, 1.85 | 0.55                                                     | 0.34, 0.87 | 0.65                                                     | 0.41, 1.05  | 1.65                                                     | 0.23, 11.70 | 0.94                                                | 0.56, 1.60 |
|         | 32–33                            | 0.74                                               | 0.45, 1.24 | 0.80                                                    | 0.51, 1.25 | 0.99                                                     | 0.71, 1.37 | 0.80                                                     | 0.54, 1.19  | 1.10                                                     | 0.55, 2.21  | 1.32                                                | 0.86, 2.03 |
|         | 34–36                            | 0.58                                               | 0.41, 0.81 | 0.95                                                    | 0.78, 1.16 | 1.04                                                     | 0.91, 1.20 | 1.12                                                     | 0.98, 1.27  | 1.54                                                     | 1.34, 1.78  | 1.27                                                | 1.03, 1.57 |
|         | 37–38                            | 0.66                                               | 0.51, 0.85 | 1.00                                                    | 0.89, 1.12 | 1.06                                                     | 0.98, 1.14 | 1.15                                                     | 1.08, 1.23  | 1.18                                                     | 1.10, 1.27  | 1.13                                                | 1.00, 1.29 |
|         | 39–41                            | 0.93                                               | 0.81, 1.07 | 0.88                                                    | 0.82, 0.94 | 0.93                                                     | 0.89, 0.97 | 1.00                                                     | [Reference] | 1.03                                                     | 0.98, 1.08  | 1.04                                                | 0.95, 1.14 |
|         | 42–45                            | 1.14                                               | 0.82, 1.59 | 0.78                                                    | 0.65, 0.93 | 0.83                                                     | 0.74, 0.94 | 0.89                                                     | 0.79, 1.00  | 0.92                                                     | 0.77, 1.10  | 0.79                                                | 0.57, 1.09 |
| Pooled  | <32                              | 0.58                                               | 0.42, 0.79 | 1.07                                                    | 0.82, 1.39 | 0.71                                                     | 0.53, 0.95 | 0.63                                                     | 0.43, 0.92  | 1.65                                                     | 0.23, 11.77 | 0.89                                                | 0.57, 1.38 |
|         | 32–33                            | 0.65                                               | 0.46, 0.92 | 0.86                                                    | 0.65, 1.13 | 1.09                                                     | 0.88, 1.36 | 0.81                                                     | 0.60, 1.08  | 1.58                                                     | 0.98, 2.54  | 1.32                                                | 0.96, 1.93 |
|         | 34–36                            | 0.69                                               | 0.56, 0.84 | 0.97                                                    | 0.86, 1.10 | 1.04                                                     | 0.95, 1.14 | 1.14                                                     | 1.04, 1.25  | 1.33                                                     | 1.19, 1.49  | 1.22                                                | 1.04, 1.42 |
|         | 37–38                            | 0.78                                               | 0.67, 0.90 | 0.95                                                    | 0.88, 1.02 | 1.07                                                     | 1.01, 1.12 | 1.14                                                     | 1.09, 1.19  | 1.23                                                     | 1.17, 1.29  | 1.16                                                | 1.06, 1.27 |
|         | 39–41                            | 0.84                                               | 0.77, 0.92 | 0.87                                                    | 0.83, 0.91 | 0.92                                                     | 0.89, 0.95 | 1.00                                                     | [Reference] | 1.03                                                     | 1.00, 1.07  | 1.06                                                | 0.99, 1.13 |
|         | 42–45                            | 0.92                                               | 0.73, 1.16 | 0.78                                                    | 0.69, 0.87 | 0.84                                                     | 0.78, 0.91 | 0.90                                                     | 0.83, 0.98  | 0.92                                                     | 0.80, 1.05  | 0.82                                                | 0.64, 1.05 |

FI, Finland; NO, Norway; SE, Sweden

<sup>a</sup> Birthweight z scores calculated according to Maršál et al intrauterine growth reference [23] <sup>b</sup> HRs are adjusted for child's sex and birth year and mother's age, education level, parity, diabetes during pregnancy and hypertensive disorders during pregnancy (model 2) <sup>c</sup> Not enough individuals for the analyses

**ESM Table 15** Country-specific associations between gestational age week by week and the risk of type 1 diabetes

| Gestational week | Country                   |                 |                 |             |                           |                 |                 |             |                           |                 |                 |             |
|------------------|---------------------------|-----------------|-----------------|-------------|---------------------------|-----------------|-----------------|-------------|---------------------------|-----------------|-----------------|-------------|
|                  | Finland                   |                 |                 |             | Norway                    |                 |                 |             | Sweden                    |                 |                 |             |
|                  | Type 1 diabetes, <i>n</i> | Total, <i>n</i> | HR <sup>a</sup> | 95% CI      | Type 1 diabetes, <i>n</i> | Total, <i>n</i> | HR <sup>a</sup> | 95% CI      | Type 1 diabetes, <i>n</i> | Total, <i>n</i> | HR <sup>a</sup> | 95% CI      |
| 23–28            | 14                        | 4687            | 0.71            | 0.32, 1.13  | 6                         | 3737            | 0.35            | 0.16, 0.79  | 28                        | 7192            | 0.69            | 0.44, 1.45  |
| 29               | 8                         | 1593            | 0.76            | 0.38, 1.52  | <5                        | 1553            | 0.53            | 0.20, 1.42  | 14                        | 2876            | 0.72            | 0.43, 1.22  |
| 30               | 13                        | 2214            | 0.86            | 0.50, 1.48  | 8                         | 2218            | 0.76            | 0.38, 1.53  | 25                        | 3820            | 0.97            | 0.66, 1.44  |
| 31               | 18                        | 2911            | 0.87            | 0.54, 1.38  | 12                        | 2898            | 0.85            | 0.48, 1.51  | 29                        | 5056            | 0.84            | 0.59, 1.22  |
| 32               | 24                        | 4359            | 0.76            | 0.51, 1.14  | 23                        | 4358            | 1.10            | 0.73, 1.66  | 46                        | 7512            | 0.91            | 0.68, 1.22  |
| 33               | 66                        | 6553            | 1.39            | 1.09, 1.77  | 32                        | 6536            | 0.99            | 0.70, 1.40  | 77                        | 11,327          | 1.00            | 0.80, 1.25  |
| 34               | 94                        | 10,958          | 1.20            | 1.09, 1.47  | 61                        | 11,010          | 1.11            | 0.86, 1.44  | 150                       | 18,753          | 1.18            | 1.00, 1.38  |
| 35               | 166                       | 18,768          | 1.19            | 1.02, 1.40  | 77                        | 17,350          | 0.89            | 0.71, 1.12  | 225                       | 30,974          | 1.06            | 0.93, 1.22  |
| 36               | 297                       | 36,230          | 1.09            | 0.96, 1.23  | 182                       | 31,702          | 1.16            | 1.00, 1.36  | 490                       | 57,623          | 1.24            | 1.13, 1.36  |
| 37               | 777                       | 81,658          | 1.25            | 1.15, 1.35  | 374                       | 64,286          | 1.21            | 1.08, 1.36  | 1085                      | 129,510         | 1.24            | 1.16, 1.32  |
| 38               | 1810                      | 214,047         | 1.18            | 1.11, 1.25  | 786                       | 149,985         | 1.12            | 1.03, 1.22  | 2473                      | 336,856         | 1.13            | 1.07, 1.18  |
| 39               | 3179                      | 415,614         | 1.10            | 1.04, 1.15  | 1356                      | 282,586         | 1.04            | 0.96, 1.11  | 3996                      | 571,026         | 1.10            | 1.05, 1.14  |
| 40               | 3287                      | 472,401         | 1.00            | [Reference] | 1719                      | 369,290         | 1.00            | [Reference] | 4467                      | 700,428         | 1.00            | [Reference] |
| 41               | 2067                      | 308,044         | 0.98            | 0.92, 1.03  | 1178                      | 272,340         | 0.92            | 0.86, 0.99  | 2726                      | 451,551         | 0.96            | 0.91, 1.00  |
| 42               | 495                       | 72,006          | 0.99            | 0.90, 1.09  | 447                       | 101,214         | 0.82            | 0.74, 0.91  | 942                       | 164,610         | 0.90            | 0.84, 0.97  |
| 43–44            | 7                         | 1343            | 0.58            | 0.27, 1.21  | 99                        | 16,626          | 0.92            | 0.75, 1.12  | 83                        | 11,077          | 0.92            | 0.74, 1.14  |

<sup>a</sup> HRs are adjusted for child's sex and birth year and mother's age, education level, parity, diabetes during pregnancy and hypertensive disorders during pregnancy (model 2)

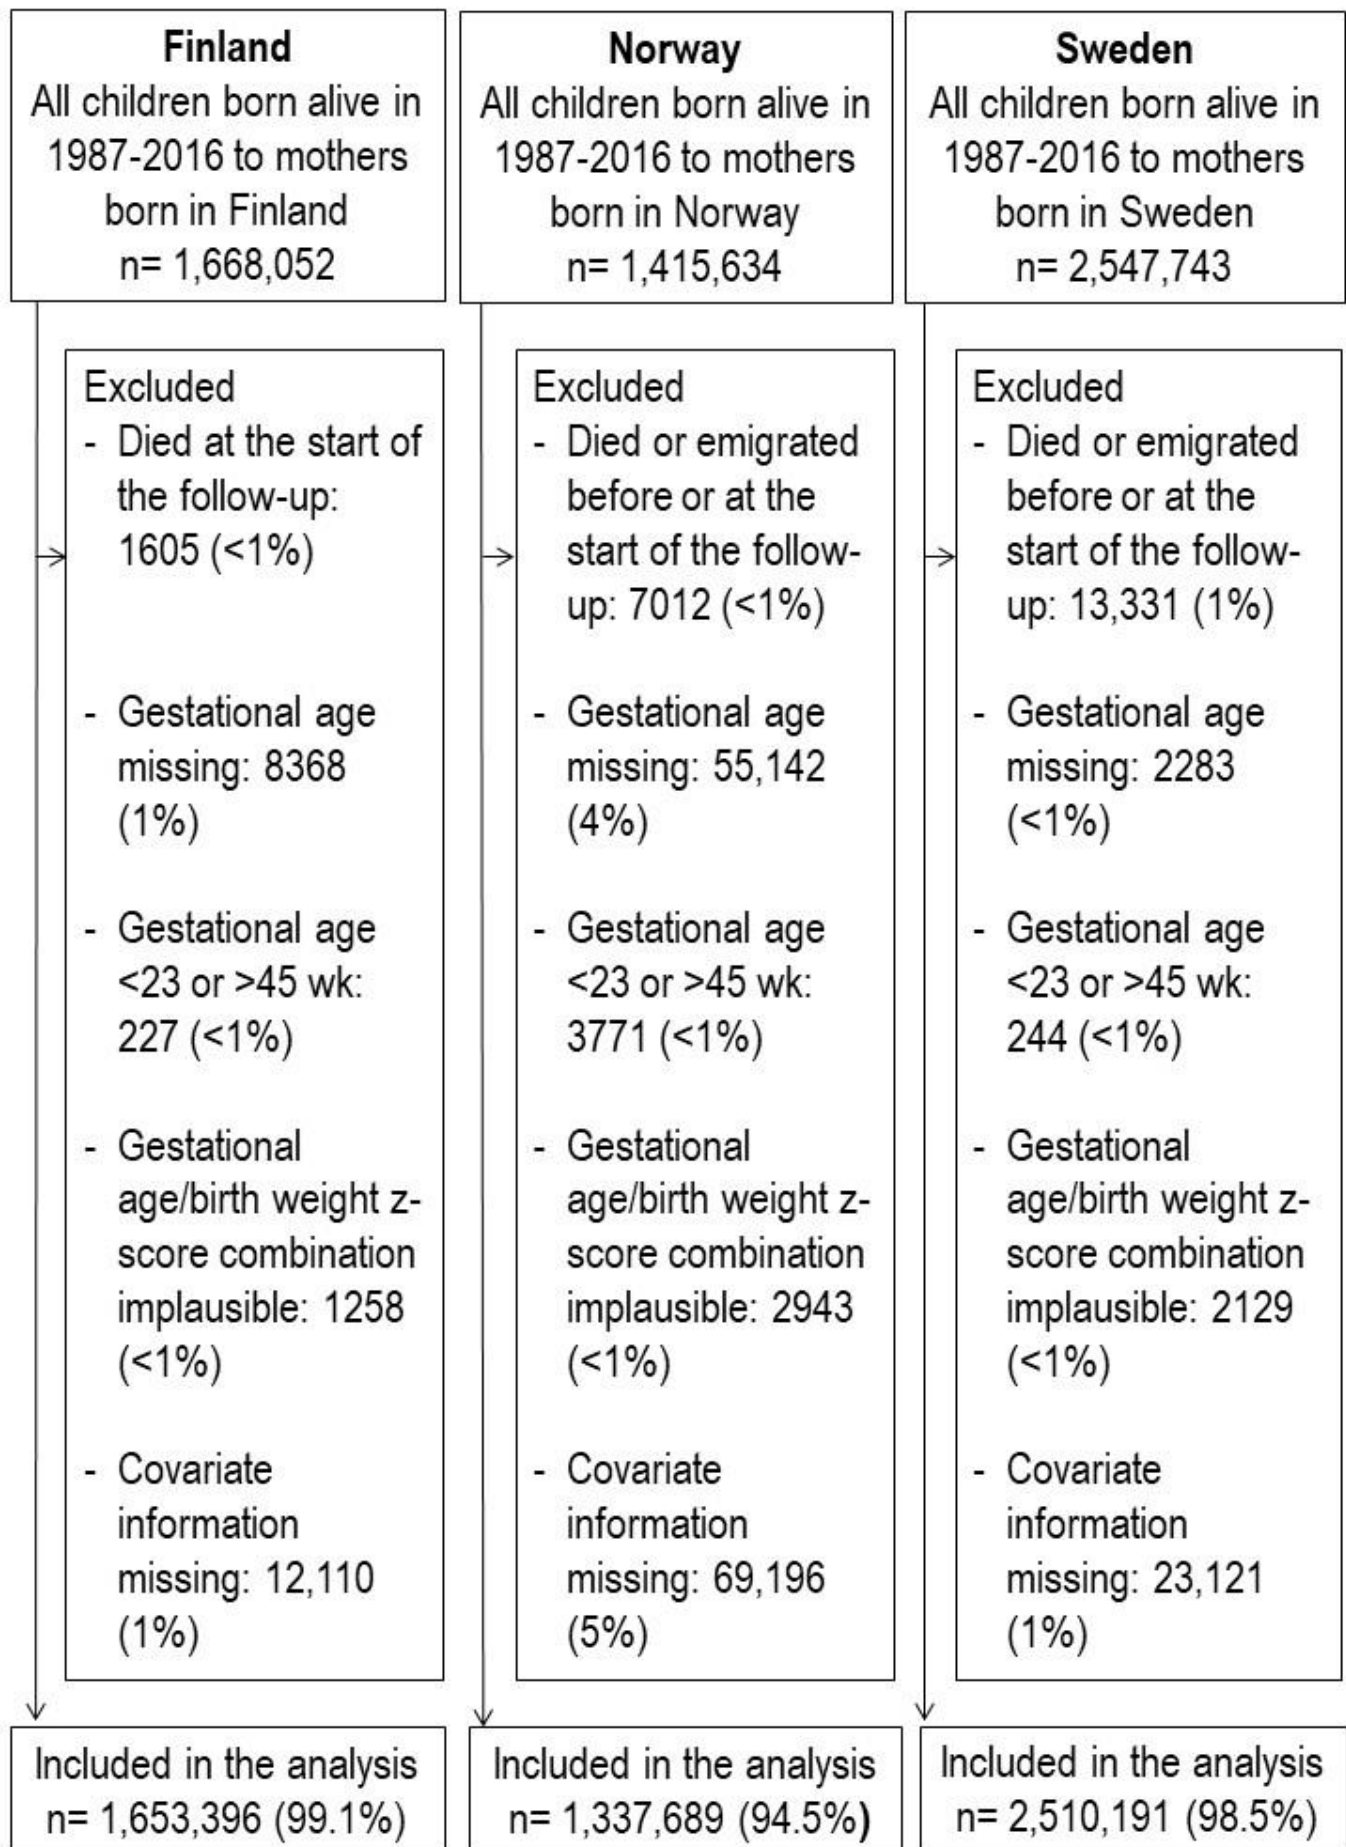

ESM Fig. 1 Flow chart of the study participants

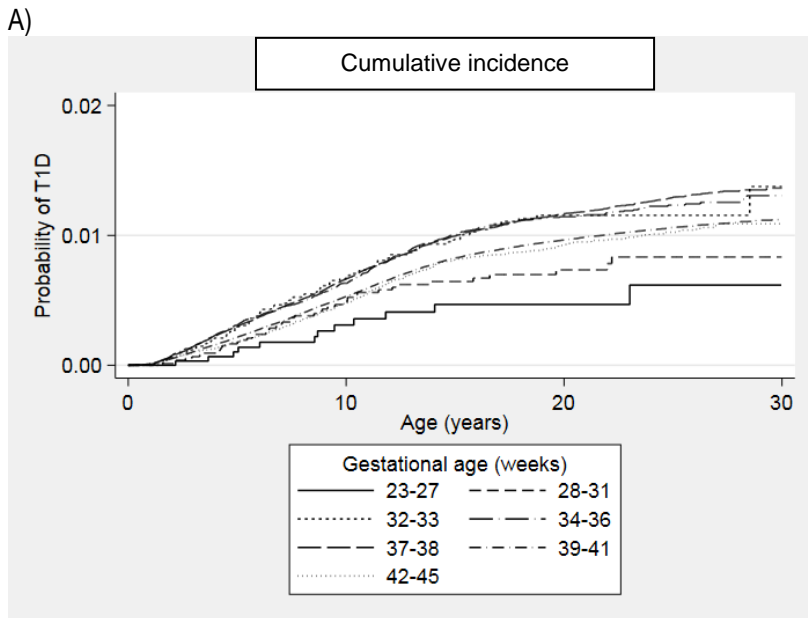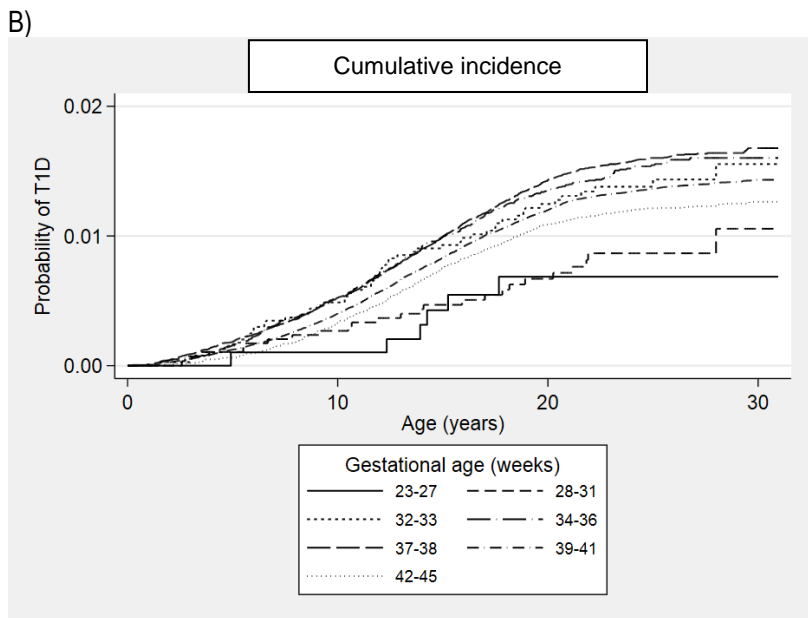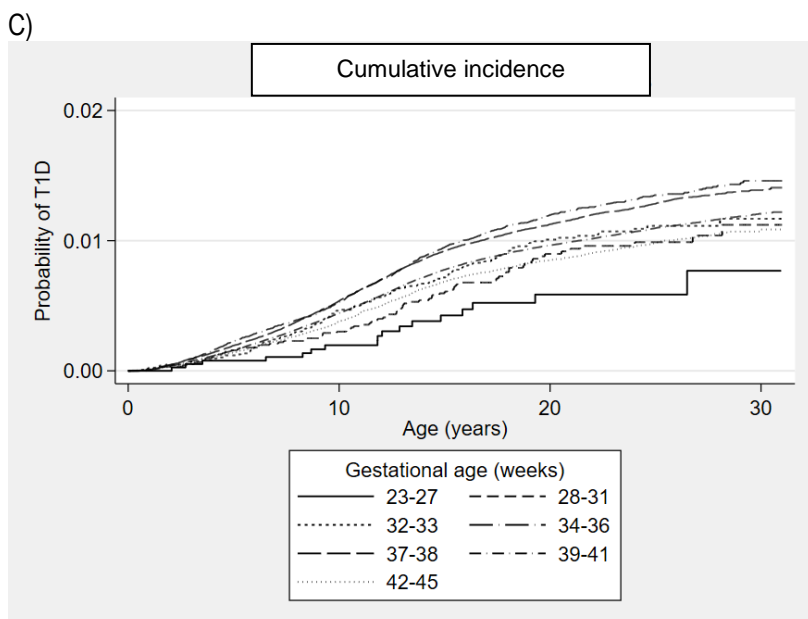

**ESM Fig. 2.** Cause-specific cumulative incidence of type 1 diabetes in gestational age categories in A) Finland, B) Norway, and C) Sweden

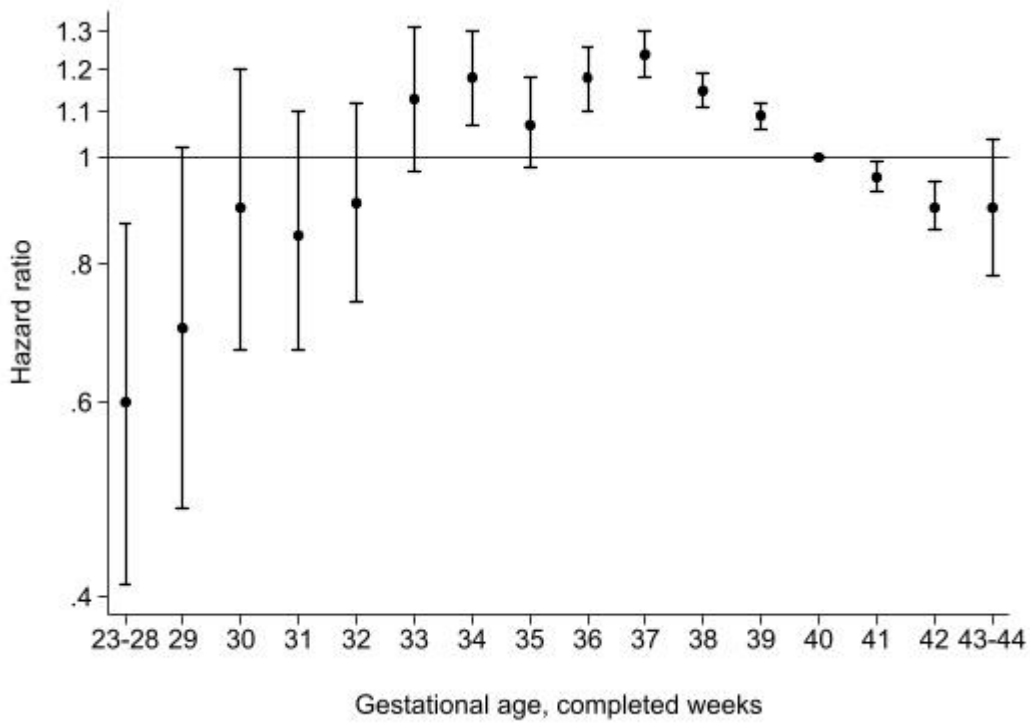

**ESM Fig. 3.** Association between gestational age in weeks and risk of type 1 diabetes in offspring in Finland, Norway and Sweden. Gestational weeks 23–28 and 43–44 are combined and week 40 is the reference category. Pooled HRs are adjusted for child’s sex, birth year and birthweight z score and mother’s age, education level, parity, diabetes during pregnancy and hypertensive disorders during pregnancy (model 2).
